# Supplementary material for: iLoc-Plant: a multi-label classifier for predicting the subcellular localization of plant proteins with both single and multiple sites
Source: Royal Society of Chemistry journal article supplement (doi:10.1039/c1mb05232b), 2011-10-10
Supplement: c1mb05232b_2.pdf [file c1mb05232b_2.pdf]

**Online Supporting Information S2a.** The degenerate testing dataset used for a head-to-head comparison between **TargetP** (Emanuelsson et al. *J. Mol. Biol.*, 2000, 300, 1005-1016) and **iLoc-Plant** of this paper. The dataset contains 100 single-location proteins classified into the following 2 subcellular locations: (1) chloroplast, and (2) mitochondrion, with each containing 50 protein sequences that were randomly picked from Swiss-Prot database (Release 2011\_06 of 31-May-11). To avoid bias, none of the proteins included here occurs in the training dataset of **TargetP**, nor in the training dataset of **iLoc-Plant**. See the text of the paper for further explanation

---

### (1) 50 Chloroplast proteins

>A6BM42

MSPKTETKASVGFQAGVKDYRLTYYPYQTKDITDILAAFRVTPQPGVPPEEAGAAVA  
SSTGTTTVDGLTSLDRYKGRCYDLEPVPGEDNLFIAVAYPLDLFEVGSVTNMFTSIVG  
NVFGYKALRALRLEDLRIIPPAYIKTFQGGPHGIQVERDKLNKYGRPLLGCTIKPKLGLSA  
KNYGRAVYECLRGGLDFTKDDENVNSQPFMRDRFVFCAEALNKAQAETGEIKGHYLNAT  
AGTCEEMIKRAVFARELGVP IVMHDYLTGGFTANTSLAHYCRDNGLLLHIHRAMHAVIDR  
QKNHGMHFRVLAKALRLSGGDHIHGGTVVGKLEGEREITLGFVDLLRDDFVEKDRSRGIY  
FTQDVSMGPVLPVASGGIHHVMPALTEIFGDDAVLQFGGGTLGHGPNAPGAVANRVALEA  
CVQARNEGRDLVREGNEVIREASKSAELAAACEVKEIKFEFAPVDTV

>A9LYD5

MKEQKLIHEGLITESLPNGMFVRLDNEDLVLYISGRIRRSSIRILPGDRVKIEVSRYDS  
TRGRIIYRLRNKDSNE

>B2Y1Z2

MKPRLLSFRGYRYRYRYGYRRKKPEIRNIDKGI IHIILASFNNTIITVTDVKGHVIYS  
SAGACGFKGPKKGSFAAAQKATESVIYRVVIKRAAVLITGCGKGRDAALRVIQHNRIPIR  
AVVDITPNPHNGCRPPAKRRV

>O20241

MSPQTETKASVGFKAGVKDYKLNYYTPDYVTKDITDILAAFRVTPQPGVPPEEAGAAVA  
SSTGTTTVDGLTSLDRYKGRCYHIEPVAGEDNQYICYVAYPLDLFEEGSVTNMFTSIVG  
NVFGFKALRALRLEDLRIPTSYVKTFQGGPHGIQVERDKLNKYGRPLLGCTIKPKLGLSA  
KNYGRAVYECLRGGLDFTKDDENVNSQPFMRDRFLFCAEALFKAQAETGEIKGHYLNAT  
AGTCEEMMKRAVFARELGVP IVMHDYLTGGFTANTTLAHYCRDNGLLLHIHRAMHAVIDR  
QKNHGIHFRVLAKALRMSGGDHIHAGTVVGKLEGEREITLGFVDLLRDDFIEKDRSRGIY  
FTQDVSLPGVLPVASGGIHHVMPALTEIFGDDSVLQFGGGTLGHGPNAPGAVANRVALEA  
CVQARNEGRDLAREGNEIIRAACKSPELAAACEVKEIKFEFEAMDTL

>O22137

MLVFKSTMECSISSTIHLVLSCKTSDDVNQIHGRLIKTGIIKNSNLTTTRIVLAFASSRRP  
YLADFARCVFHEYHVCSFSFGEVEDPFLNAVIKSHSHGKDPRQALLLLCLMLENGVSVDK  
FSLSLVLKACSRGFGVKGGMQIHGFLKKTGLSDFLQNCILIGLYLKCGCLGLSRQMFDRM  
PKRDSVSYNSMIDGYVKCGLIVSARELFDLMPMEMKNLISNSMISGYAQTSDGVDIASKL  
FADMPEKDLSNSMIDGYVKHGRIEDAKGLFDVMPRRDVVTATMIDGYAKLGFVHHAKT  
FDQMPHRDVVAYNSMMAGYVQNKYHMEALEIFSDMEKESHLLPDDTTLVIVLPAIAQLGR

LSKAIDMHLYIVEKQFYLGKGLGVALIDMYSKCGSIQHAMLVFEGIENKSIDHNAMIGGL  
AIHGLGESAFDMLLQIERLSLKPDDITFVGVNACSHSGLVKEGLLCFELMRRKHKIEPR  
LQHYGCMVDILSRSGSIELAKNLIEMPVEPNVIRTFLTACSHHKEFETGELVAKHLIL  
QAGYNPSSYVLLSNMYASFQGMKDVRRVRTMMKERKIEKIPGCSIELDGRVHEFFVDSIEV  
SSTL

>078258

KASVGFKAGVKDYRLTYTPEYQTKDITDILAAFRVTPQPGVPPPEEAGAAVAEESSTGTTT  
VTDGLTSLDRYKGRCYDIEPVAGEESQFIAYVAYPLDLFEEGSVTNLFTSIVGNVFGFKA  
LRALRLEDLRI PPAYSKTFQGP PHGIQVERDKLNKYGRPLL GCTIKPKLGLSAKNYGRAV  
YECLRGGLDFTKDDENVNSQPFMRRDRFVFCAEAINKAQAETGEIKGHYLNATAGTCEEM  
MKRAIFARELGVPIVMHDYLTGGFTANTSLAHYCRDNGLLLHIHRAMHAVIDRQRNHGMH  
FRVLAKALRMSGGDHVVHAGTVVGKLEGERDVTLGFVDLLRDDFIEKDRSRGIYFTQDVSM  
PGVLPVASGGIHVHMPALTEIFGDDSVLQFGGGT LGHPGNAPGAVANRVAVEACVQARNE  
GRDLAREGNEVIREASK

>078259

KASVGFKAGVKDYRLTYTPEYQTKDITDILAAFRVTPQPGVPPPEEAGAAVAEESSTGTTT  
VTDGLTSLDRYKGRCYDIEPVAGEESQFIAYVAYPLDLFEEGSVTNLFTSIVGNVFGFKA  
LRALRLEDLRI PPAYSKTFQGP PHGIQVERDKLNKYGRPLL GCTIKPKLGLSAKNYGRAV  
YECLRGGLDFTKDDENVNSQPFMRRDRFVFCAEAINKAQAETGEIKGHYLNATAGTCEEM  
MKRAIFARELGVPIVMHDYLTGGFTANTSLAHYCRDNGLLLHIHRAMHAVIDRQRNHGMH  
FRVLAKALRMSGGDHVVHAGTVVGKLEGERDVTLGFVDLLRDDFIEKDRSRGIYFTQDVSM  
PGVLPVASGGIHVHMPALTEIFGDDSVLQFGGGT LGHPGNAPGAVTNRVAVEACVQARNE  
GRDLAREGNEVIREACK

>078261

KASVGFKAGVKDYRLTYTPEYQTKDITDILAAFRVTPQPGVPPPEEAGAAVAEESSTGTTT  
VTDGLTSLDRYKGRCYDIEPVAGEESQFIAYVAYPLDLFEEGSVTNLFTSIVGNVFGFKA  
LRALRLEDLRI PPAYSKTFQGP PHGIQVERDKLNKYGRPLL GCTIKPKLGLSAKNYGRAV  
YECLRGGLDFTKDDENVNSQPFMRRDRFVFCAEALYKAQAETGEIKGHYLNATAGTCEEM  
MKRAVFARELGVPIVMHDYLTGGFTANTTLAHYCRDNGLLLHIHRAMHAVIDRQRNHGMH  
FRVLAKALRMSGGDHIVHAGTVVGKLEGERDVTLGFVDLLRDDFIEKDRSRGIFFTQDVSM  
PGVLPVASGGIHVHMPALTEIFGDDSVLQFGGGT LGHPGNAPGAVANRVALEACVQARNE  
GRDLAREGNEVIREAAK

>081192

MSIISMNVSILSKPLNCLHNLERRPSKALLVPCTAPTARLRASCSSKLQEAHQIRRSNGY  
QPALDSNYIQSLNTPYTEERHLDRKAELIVQVRILLKEKMEPVQQLLELIHDLKYLGLSDF  
FQDEIKEILGVIYNEHKCFHNNEVEKMDLYFTALGFRLLRQHGFNISQDVFNCFKNEKGI  
DFKASLAQDTKQMLQLYEASFLLRKGEDTLELAREFATKCLQKKLDEGGNEIDENLLLIR  
HSLDLPLHRIQSVEARFIDAYARRPDMNPLIFELAKLNFNI IQATHQOQLKDLRSRSLCF  
PEKLPFVRDRLVESFFAVGMFEPHQHGYQRKMAATIIIVLATVIDDIYDVYGTLDLELELFT  
DTFKRDTESITRLPYMQLCYGVHNYISDAAYDILKEHGFFCLQYLRKSVVDLVEAYFHE  
AKYHSGYTPSLDEYLNIAKISVASPAIISPTYFTFANASHDTAVIDSLYQYHDILCLAGI  
ILRLPDDLGTSYFELARGDVPKTIQCYMKETNASEEEAVEHVKFLIREAKDMNTAIAAGY  
PFPDGMVAGAANIGRVAQFIY LHGDGFGVQHSKTYEHIAGLLFEPYA

>081852

MATLKPSFTVSPNSNPIRFGSFPQCFLRVKPRRLILPRFRKTTGGGGGLIRCELPDF  
HLSATATTVSGVSTVNLVDQVQIPKGEMSVHKFGGTCVGN SQIRIRNVAEVIINDNSERKL  
VVVSAMSKVTDDMYDLIRKAQSRDDSYLSALEAVLEKHRLTARDLLDGDLLASFLSHLHN  
DISNLKAMLRAIYIAGHASESFSDV VAGHGELSAQMLSYVVRKTGLECKMDTRDVLIVNP  
TSSNQVDPDFGESEKRLDKFSLNPSKII IATGFIASTPQNIPTTLKRDGSDFSAAIMGAL  
LRARQVTITDVDGVYSADPRKVNEAVILQ TLSYQEAEMS YFGANVLHPRTIIPVMRYNIP  
IVIRNIFNLSAPGTIICQPPEDDYDLKLTTPVKGFATIDNLALINVEGTGMAGVPGTASD  
IFGCVKDVGANVIMISQASSEHSVCF AVPEKEVNAVSEALRSRFSEALQAGRLSQIEVIP  
NCSILAAVGQKMASTPGVSCTLFSALAKANINVRAISQGCSEYNVTVVIKREDSVKALRA  
VHSRFFLSRRTTLAMGIVGPGLIGATLLDQLRDQAAVLKQEFNIDLRVLGITGSKMLLSD  
IGIDLSRRELLNEKGTEADLDKFTQQVHGNHFIPNSVVVDCTADSAIASRYDLRKGIVH  
ITPNKKANSGLDQYLKLRDLQRKSYTHYFY EATVGAGLPIISTLRGLLETGDKILRIEG  
ICSGTLSYLFNMFVDRSFSEVVTEAKNAGFTEPDRDDLSGTDVARKVII LARESGLKL  
DLADLPIRSLVPEPLKGCTSV EEFMEKLPQYDGD LAKERLDAENSGEVLRYGVVDAVNQ  
KGTVELRRYKKEHPFAQLAGSDNIIAFTTTRYKDHPLIVRGP GAGAQVTAGGIFSDILRL  
ASYLGAPS

>P00221

MAATTTTMMGMATTFVPKPQAPPMM AALPSNTGRSLFGLKTGSRGGRMTMAAYKVTLVTP  
TGNVEFQCDDVYILDAAEEEGIDLPYSCRAGSCSSCAGKKTGSLNQDDQSFLDDDQID  
EGVLTCAAYPVSDVTIETHKEEELTA

>P00235

AYKTVLKTPSGEFTLDVPEGTTILDAAEEAGYDLFPSCRAGACSSCLGKVVSGSVDESEG  
SFLDDGQMEEGFVLTICIAIPESDLVIETHKEEELF

>P00870

MQVPPLGLKFFETLSYLPPLTTEQLLAEVNYLLVKGIPPLEFEVKDGFVYREHDKSPGY  
DGRYTMKLPFMFGGTDPAQVVNEVEEVKAPPDAFVRFIFGNDKREVQCISFIAYKPAGY

>P00874

MSPQTETKASVGFKAGVKDYKLTYYTPEYETKDTDILAAFRVTPQLGVPPEEAGAAVA AE  
SSTGTTTVDGLTSLDRYKGRCYHIEPVGDPDQYICYVAYPLDLFEEGSVTNMFTSIVG  
NVFGFKALRALRLEDLRI PPAYSKTFQGP PHGIQVERDKLNKYGRPLLGCTIKPKLGLSA  
KNYGRACYECLRGGLDFTKDDENVNSQPFMRRDRFVFCAEAIYKAQAETGEIKGHYLNAT  
AGTCEEMIKRAVFARELGVP IVMHDYLTGGFTANTTL SHYCRDNGLLLHIHRAMHAVIDR  
QKNHGMHFRVLAKALRMSGGDHIHSGTVVGKLEGEREITLGFVDLLRDDFIEKDRSRGIF  
FTQDVSMPGVIVVASGGI HVHMPALTEIFGDDSVLQFGGGTLGH PGNAPGAAANRVALEA  
CVQARNEGRDLAREGNEIIKAACKSAELAAACEIKEIKFDGFKAMDTI

>P00875

MSPQTETKASVEFKAGVKDYKLTYYTPEYETLDTDILAAFRVSPQPGVPPEEAGAAVA AE  
SSTGTTTVDGLTNLDRYKGRCYHIEPVAGEENQYICYVAYPLDLFEEGSVTNMFTSIVG  
NVFGFKALRALRLEDLRI PVAYVKTFQGP PHGIQVERDKLNKYGRPLLGCTIKPKLGLSA  
KNYGRAVYECLRGGLDFTKDDENVNSQPFMRRDRFLFCAEALYKAQAETGEIKGHYLNAT  
AGTCEMMKRAVFARELGVP IVMHDYLTGGFTANTTL SHYCRDNGLLLHIHRAMHAVIDR  
QKNHGMHFRVLAKALRLSGGDHIHSGTVVGKLEGERDITLGFVDLLRDDYTEKDRSRGIY  
FTQSVSTPGVLPVASGGI HVHMPALTEIFGDDSVLQFGGGTLGH PGNAPGAVANRVALEA  
CVQARNEGRDLAREGNTIIREATKSP ELAAACEVKEIKFEFPAMDTV

>P00876

MSPQTETKASVGFKAGVKEYKLTYYTPEYQTKDTDILAAFRVTPQPGVPEEAGAAVAE  
SSTGTTTVDGLTSLDRYKGRCYRIERVVGEKDQYIAYVAYPLDLFEEGSVTNMFTSIVG  
NVFGFKALRALRLEDLRIPPAYVKTFQGGPHGIQVERDKLNKYGRPLLGCITKPKLGLSA  
KNYGRAVYECLRGGLDFTKDDENVNSQPFMRDRFLFCAEALYKAQAETGEIKGHYLNAT  
AGTCEEMIKRAVFARELGVPIVMHDYLTGGFTANTSLAHYCRDNGLLLHIHRAMHAVIDR  
QKNHGIHFRVLAKALRMSGGDHIHSGTVVGKLEGERDITLGFVDLLRDDFVEQDRSRGIY  
FTQDVSPLPGVLPVASGGIHHVMPALTEIFGDDSVLQFGGGTLGHGPNAPGAVANRVALEA  
CVKARNEGRDLAQEGNEIIREACKSPELAAACEVKEIVFNFAAVDVLDK

>P05348

MAPTVMMASATAVAPFQGLKSTASLPVARRSSRSLGNVSNNGRIRCMQVPAYGNKKFET  
LSYLPPLSTDDLLKQVDYLLRNGIPCLEFSKVGFBVYRENSTSPCYDGRYTMKLPMPFCN  
DATQVYKELQEAIKSYPDFAHRVIGFDNIKQTQCVSFIAYKPPGSD

>P06292

MSPQTETKAGVGFKAGVKDYRLTYTTPDYETKDDTDILAAFRMTPQPGVPAEEAGNAVAE  
SSTGTTTVDGLTNLDRYKGRCYDIDVPVPEENQYIAYVAYPLDLFEEGSVTNMFTSIVG  
NVFGFKALRALRLEDLRIPPAYTKTFQGGPHGIQVERDKLNKYGRPLLGCITKPKLGLSA  
KNYGRAVYECLRGGLDFTKDDENVNSQPFMRDRFLFVAEAIYKSQAETGEIKGHYLNAT  
AGTCEEMLKRAACARELGVPIVMHDYLTGGFTANTSLAFYCRDNGLLLHIHRAMHAVIDR  
QKNHGIHFRVLAKALRMSGGDHIHAGTVVGKLEGDRQVTLGFVDLLRDDYIEKDRSRGIY  
FTQDVSPLPGVFPVASGGIHHVMPALTEIFGDDSVLQFGGGTLGHGPNAPGAVANRVSLEA  
CVQARNEGRDLAREGNEIIREACKSPELSAACEIKEIKFEFDIIDTL

>P06364

MPKSVKINLRKGRRLPKGVIHIQASFNNTIVTVTDIRGQVSSSAGACGFKGTTKSTP  
FAAQTAENAIRILIDQGMKQAEVMISGPGPRDALTALRAIRRSIILSFVRDVTMPHNG  
CRPPRKRVR

>P06368

MPTIQQLIRNKRQPIENRTKSPALKGCPQRRGVCTRVYTTTPKKPNSALRKIARVRLTSG  
FEITAYIPGIGHNLQEHSSVVLVRGGRVKDLPGVRYHIIRGTLDAVGKDRQQGRSKYGVK  
KSK

>P06370

MAKKSIIQREKKRQNLKYYKILRNSLKKKITETSSLDEKEFQKKLQSLPRNSAPTRLHR  
RCFLTGRPKANYRDFGLSRHLLREMAHACLLPGVTKSS

>P06385

MTRVCRGYVARKRRKNILTLTSGFQGTSHSKLFRNTANQQGMRALASSHRDRGKRKNLRLR  
ITRVNAAARDNGISYNKLIIEYLYKKKILLNRKILAQIAILDKFCFSTIIKNIITE

>P06388

MQNTNSNKKIRAVAKHIHMSPHKVVRRVVSQIRGRSIEQALMILEFMPYRACNPILQLLSS  
AAANANHNFGLSKTNLFISEIQVNKGTFFKRFQPRAGRGYPHKTCHITIVLNILPK

>P06390

MNQVKYPVLTEKTIRLLEKNQYSFDVNIDSNKTQIKKIELFFNVKVISVNSHRLPKKKKK  
IGTTTGTYTVRYKRMIIKLQSGYSIPLFSNK

>P06589

MTSFKLVKYTPRIKKKKGLRKLARKVPTDRLLKFERVFKAQKRIHMSVFKAQRVLDEIRR

YYEETVMILNLMPIRASYPIILKLVYSAAANATHYRDFDKTNLFITKAEVSRSTIMKKFRP  
RARGRSYSIKKTCNITIVLNIVKSKS

>P07854

MASLSATTTVRVQPSSSSLHKLSQGNRCSSIVCLDGKSSFPTLRTSRRRSFISAACKET  
IDKVCDIVKEKLALGADVVTADSEFSKLGADSLDVEIVMNLEEEFGINVDEDKAQDIS  
TIQQAADVIESLLEKKA

>P08527

MAKKSIIQREKKRQKLEQKYHLIRRSKSKKIRSKVSPLSLSEKTKMQEKLQSLPRNSAPT  
RLHRRCFLTGRPRANYRDFGLSGHILREMVYACLLPGATRSS

>P09559

MAVCTVYTIPTTTHLGSSFNQNNKQVFFNYKRSSSSNNTLFTTRPSYVITCSQQQTIVIG  
LAADSGCGKSTFMRRLTSVFGGAAEPPKGGNPDSNTLISDTTTVICLDDFHSLDRNGRKY  
EKVTALDPKANFDLMEQVKALKEGKAVDKPIYNHVSGLLDPPELIQPPKILVIEGLHP  
MYDARVRELLDFSIYLDISNEVKFAKIQRDMKERGHSLESIKASIESRKPFDAYIDPQK  
QHADVIEVLPTELIPDDDEGKVLVRMIQKEGVKFFNPVYLFDEGSTISIPCGRKLTC  
YPGIKFSYGPDTFYGNEVTVEMDGMFDRLDELIYVESHLNLSTKFYGEVTQOMLKHQN  
FPGSNNGTGFFQTIIGLKIRDLEQLVARSSTATATAKA

>P11383

MSPQTETKAGVGFKAGVKDYKLYYTPPEYETKDTDILAAFRVSPQPGVPPEEAGAAVA  
SSTGTTTVDGLTSLDRYKGRCYHIEPVAGEDSQICYVAYPLDLFEEGSVTNMFTSIVGN  
VFGFKALRALRLEDLRIPTYSKTFQGGPHGIQVERDKLNKYGRPLLCTIKPKLGLSAK  
NYGRACYECLRGGLDFTKDDENVNSQPFMRDRFVFCAEAIYKSAETGEIKGHYLNATA  
GTCEEMIKRAVFARELGVPIVMHDYLTGGFTANTTLAHYCRDNGLLLHIHRAMHAVIDRQ  
KNHGMHFRVLAKALRMSGGDHIHSGTVVGKLEGEREMTLGFVDLLRDDFIEKDRARGIFF  
TQDVSMGPVPIPVASGGIHVHMPALTEIFGDDSVLQFGGGTLGHPGNAPGAAANRVALEAC  
VQARNEGRDLAREGNEIIRAACKSPELAAACEVKAIKFEFEPVDTIDK

>P28441

MSPQTETKASVGFKAGVKDYKLYYTPDYETKDTDILAAFRVTPQPGVPPEEAGAAVA  
SSTGTTTVDGLTSLDRYKGRCYHIEPVAGEENQYIAYVAYPLDLFEEGSVTNMFTSIVG  
NVFGFKALRALRLEDLRIPPAYSKTFFQGGPHGIQVERDKLNKYGRPLLCTIKPKLGLSA  
KNYGRAVYECLRGGLDFTKDDENVNSQPFMRDRFLFCAEAIYKAQAEETGEIKGHYLNAT  
AGTCEEMIKRAVFARELGVPIVMHDYLTGGFTANTSLAHYCRDNGLLLHIHRAMHAVIDR  
QKNHGIHFRVLAKALRMSGGDHIHAGTVVGKLEGEREITLGFVDLLRDDFIEKDRSRGIY  
FTQDVSLPGVLPVASGGIHVHMPALTEIFGDDSVLQFGGGTLGHPGNAPGAVANRVALEA  
CVQARNEGRDLAREGNEIIREACKSPELAAACEVKEIKFEFEAMDTL

>P30827

MSPQTETKASVGFKAGVKEYKLYYTPPEYETKDTDILAAFRVTPQLGVPPEEAGAAVA  
SSTGTTTVDGLTSLDRYKGRCYHIEPVAGETDQYIVYVAYPLDLFEEGSVTNMFTSIVG  
NVFGFKALRALRLEDLRIPPAYIKTFQGGPHGIQVERDKLNKYGRPLLCTIKPKLGLSA  
KNYGRAVYECLRGGLDFTKDDENVNSQPFMRDRFLFCAEALYKAQSETGEIKGHYLNAT  
AGTCEEMKRAVFARELGVPIVMHDYLTGGFTANTSLAHYCRDNGLLLHIHRAMHAVIDR  
QKNHGIHFRVLAKALRMSGGDHIHSGTVVGKLEGERDITLGFVDLLRDDFIEKDRSRGIY  
FSQDVSLPGVLPVASGGIHVHMPALTEIFGDDSVLQFGGGTLGHPGNAPGAVANRVALEA  
CVQARNEGRDLASQNEIIREASKSPELAAACEVKEIKFDSFKAMDTL

>P30828

PVAGEENQYIAYVAYPLDLFEEGSVTNMFTSIVGNVFGFKALRALRLEDLRIPTAYVKTF  
QGPPhGIQVERDKLNKYGRPLLGCtikPKLGLSAKNYGRAVYECLRGGLDFTKDDENVNS  
QPFMRDRFLFCAEALYKAQAETGEIKGHYLNATAGTCEEMMKRAIFARELGPVIVMHDY  
LTGGFTANTSLAHYCRDNGLLLHIHRAMHAVIDRQKNHGIHFRVLAKALRMSGGDHIHSG  
TVVGKLEGERDI

>P34915

MSPRPEIKAGVGFKAGVKDYRLTYTTPDYQTKDTDILAAFRMTPQPGVPAEECGAAVAAE  
SSTGTTTVDGLTSLDRYKGRCYAIEPVAGEENQYIAYVAYPLDLFEEGSVTNLFTSIVG  
NVFGFKALRALRLEDLRIPPAYSKTfQGPPHGIQVERDKLNKYGRPLLGCtikPKLGLSA  
KNYGRAVYECLRGGLDFTKDDENVNSQPFMRDRFLFCAEAIYKSQGETGEIKGHYLNAT  
AGTCEEMIKRAQFARELGMPIVMHDYLTGGFTANTSLAHYCRDNGLLLHIHRAMHAVLDR  
QKNHGMHFRVLAKALRLSGGDHIHSGTVVGKLEGERQVTLGFVDLLRDDYIEKDRSRGIY  
FTQDVSLPGVLPVASGGIHVHMPALTEIFGDDSVLQFGGGTLGHPGNAPGAVANRVALEA  
CVQARNEGRDLAREGNEIIREAAKSPELAAACEVKEIKFEFDTVDTL

>P36476

MSPQTETKAGVGFKAGVKDYRLTYTPEYKTKDTDILAAFRMTPQPGVPAEEAGAAVAAE  
SSTGTTTVDGLTSLDRYKGRCYDIEPVAGEENQYIAYVAYPLDLFEEGSVTNMLTSIVG  
NVFGFKALRALRLEDLRIPPAYSKTfLGPPhGIQVERDKLNKYGRPLLGCtikPKLGLSA  
KNYGRAVYECLRGGLDFTKDDENVNSQPFMRDRFLFVAEALFKSQAETGEIKGHYLNAT  
AGTCEEMMKRAVFARELGAPIVMHDYLTGGFTANTSLAFYCRDNGLLLHIHRAMHAVIDR  
QKNHGIHFRVLAKALRMSGGDHIHAGTVVGKLEGEREVTLGFVDLLRDDYIEKDRSRGIY  
FTQDVSMGPVFPVASGGIHVHMPALTEIFGDDSVLQFGGGTLGHPGNAPGAVANRVALEA  
CVQARNEGRDLAREGNEIIREASKSPELAAACEIKAIKFEFETIDTL

>P43188

ALADPLKVMISGAPASGKGTQCELIKTKYQLAHISAGDLLRAEIAAGSENGKRAKEFMEK  
GQLVPDEIVVNMVKERLRQPDAQENGLLDGYPRSYSQAMALETLEIRPDTFILLDVPDEL  
LVERVGRRLDPVTGKIYHLKYSPPENEEIASRLTQRFDDEEKVKLRLETTYQNIESLL  
STYENIIVKVQGDATVDAVFAKIDELLGSILEKKNEMVSST

>P43223

YYTPEYKTKDTDILAAFRMTPQPGVPAEEAGAAVAAESSTGTTTVDGLTSLDRYKGRCY  
DIEPVAGEENQYIAYVAYPLDLFEEGSVTNMLTSIVGNVFGFKALRALRLEDLRIPPAYS  
KTFMGPPHGIQVERDKLNKYGRPLLGCtikPKLGLSAKNYGRAVYECLRGGLDFTKDDEN  
VNSQPFMRDRFLFVAEALFKSQAETGEIKGHYLNATAGTCEEMMKRAVFARELGAPIVM  
HDYLTGGFTANTSLAFYCRDNGLLLHIHRAMHAVIDRQRNHGIHFRVLAKALRMSGGDHI  
HAGTVVGKLEGEREVTLGFVDLLRDDYIEKDRSRGIYFTQDVSMGPVFPVASGGIHVHMP  
ALTEIFGDDSVLQFGGGTLGHPGNAPGAVANRVALEACVQARNEGRD

>P43225

LTYTTPDYQTKDTDILAAFRMTPQPGVPAEEAGAAVAAESSTGTTTVDGLTSLDRYKGR  
CYDIEPVAGEENQYIAYVAYPLDLFEEGSVTNLFTSIVGNVFGFKALRALRLEDLRIPPA  
YSKTfIGPPHGIQVERDKLTKYGRPLLGCtikPKLGLSAKNYGRAVYECLRGGLDFTKDD  
ENVNSQPFMRDRFLSVAEALFKAQAETGEIKGHYLNATAGTCEEMMKRAIFARELGAPI  
VMHDYLTGGFTANTSLAYYCRDNGLLLHIHRAMHAVIDRQRNHGMHFRVLAKALRMSGGD  
HVHAGTVVGKLEGERDVTLGFVDLLRDDYIEKDRSRGVYFTQDVSMGPVFPVASGGIHVH

MPALTEIFGDDSVLQFGGGTLGHPGNAPGAVANRVALEACVQARNEGRDL

>P48694

MSPQTETKASVGFKAGVKEYKLTYYTPEYETKDTDILAAFRVTPQPGVPPPEEAGAAVAAE  
SSTGTTAVTDGLTSLDRYKGRCYHIEVPVPEENQYIAYVAYPLDLFEEGSVTNMFTSIVG  
NVFGFKALRALRLEDLRVPPAYIKTFQGPPHGIQVERDKLNKYGRPLLGCTIKPKLGLSA  
KNYGRAVYECLRGGLDFTKDDENVNSQPFMRDRFCFCAEALFKAQAETGEIKGHYLNAT  
AGTCEEMIKRAVFARELGVPIVMHDYLTGGFTANTSLAHYCRDNGLLLHIHRAMHAVIDR  
QKNHGMHFRVLAKGLRMSGGDHIHAGTVVGKLEGERDITLGFVDLLRDDFIEKDRSRGIY  
FTQDVSLPGVIPVASGGIHVHMPALTEIFGDDSVLQFGGGTLGHPGNAPGAVANRVALEA  
CVKARNEGRDLAAEGNEIIREASKSPELAAACEVKEIRFNFEAMDKLDKEKDL

>P48696

MSPKTETKASVGFKAGVKDYRLTYTPEYQTKDTDILAAFRVTPQPGVPPPEEAGAAVAAE  
SSTGTTTAVTDGLTSLDRYKGRCYDIEVPVPEESQFIAYVAYPLDLFEEGSVTNLFTSIVG  
NVFGFKALRALRLEDLRIPPAYSKTFFQPPHGIQVERDKLNKYGRPLLGCTIKPKLGLSA  
KNYGRAVYECLRGGLDFTKDDENVNSQPFMRDRFCFCAEALYKAQAETGEIKGHYLNAT  
AGTCEEMMKRAVFARELGVPIVMHDYLTGGFTANTSLAHYCRDNGLLLHIHRAMHAVIDR  
QRNHGMHFRVLAKALRMSGGDHIHAGTVVGKLEGEREVTLGFVDLLRDDFIEKDRSRGIY  
FTQDVSMGPVLPVASGGIHVHMPALTEIFGDDSVLQFGGGTLGHPGNAPGAVANRVALEA  
CVQARNEGRDLAREGNQVIREATKSPELAAACEVKEIKFEFDTIDRL

>P48701

VGFKAGVKDYRLTYTTPDYPTKDTDILAAFRMTPQPGVPPPEEAGAAVAAESSTGTTTAVTD  
GLTSLDRYKGRCYDIEPVSGEDKQYIAYLAYPLDLFEEGSVTNLFTSIVGNVFGFKALRA  
LRLEDLRIPPAYSKTFFIGPPHGIQVERDKLNKYGRPLLGCTIKPKLGLSAKNYGRAVYEC  
LRGGLDFTKDDENVNSQPFMRDRFLFVAEALFKAQAETGEIKGHYLNATAGTCEEMMKR  
AVFARELGAPIVMHDYLTGGFTANTSLAFYCRDNGLLLHIHRAMHAVIDRQRNHGIHFRV  
LAKALRMSGGDHIHAGTVVGKLEGEREVTLGFVDLLRDDYIEKDRSRGIYFTQDVSMGPV  
LPVASGGIHVHMPALTEIFGDDSVLQFGGGTLGHPGNAPGAVANRVASEACVQARNEGRD  
LAREGNEIIREACK

>P48710

VGFKAGVRDYRLTYTPEYKTKDTDILAAFRMTPQPGVPAEEAGAAVAAESSTGTTTAVTD  
GLTSLDRYKGRCYDIEPVAGEENQYIAYVAYPLDLFEEGSVTNLFTSIVGNVFGFKALRA  
LRLEDLRIPPAYSKTFFIGPPHGIQVERDKLNKYGRPLLGCTIKPKLGLSAKNYGRAVYEC  
LRGGLDFTKDDENVNSQPFMRDRFLFVAEALFKSQAETGEIKGHYLNATAGTCEEMLKR  
AAFARELGAPIVMHDYLTGGFTANTSLAFYCRDNGLLLHIHRAMHAVIDRQRNHGMHFRV  
LAKALRMSGGDHIHAGTVVGKLEGEREVTLGFVDLLRDDYIEKDRSRGIYFTQDVSMGPV  
LPVASGGIHVHMPALTEIFGDDSVLQFGGGTLGHPGNAPGAVANRVALEACVQARNEGRD  
LAREGNEIIRERSK

>P48711

MSPKTETKASVGFKAGVKDYRLTYTPEYQTKDTDILAAFRVTPQPGVPPPEEAGAAVAAE  
SSTGTTTAVTDGLTSLDRYKGRCYDIEPVAGEESQFIAYVAYPLDLFEEGSVTNLFTSIVG  
NVFGFKALRALRLEDLRIPPAYSKTFFQPPHGIQVERDKLNKYGRPLLGCTIKPKLGLSA  
KNYGRAVYECLRGGLDFTKDDENVNSQPFMRDRFVFCAEAIYKAQAETGEIKGHYLNAT  
AGTCEEMMKRAVFARELGVPIVMHDYLTGGFTANTSLAHYCRDNGLLLHIHRAMHAVIDR  
QKNHGMHFRVLAKALRMSGGDHIHGGTVVGKLEGEREITLGFVDLLRDDFIEKDRSRGIY

FTQDVSM PGVLPVASGGI HVHMPALTEIFGDDSVLQFGGGTLGH PGNAPGAVANRVALEA  
CVQARNEGRDLAREGNEVIREASKSPELAAACEIKEIKFEFEAVDTI

>P48714

MSPQTETKASSGFKAGVKDYRLTYTTPDYKVS DTDILAAFRMTPQPGVPPEEAGAAVAAE  
SSTGTTT VTDGLTSLDRYKGR CYGIEPVAGEENQYIAYVAYPLDLFEEGSVTNMFTSIVG  
NVFGFKALRALRLEDLRI PPAYSKTFMGPPHGIQVERDKLNKYGRPLL GCTIKPKLGLSA  
KNYGRAVYECLRGGLDFTKDDENVNSQPFMRDRFLFVAEALFKSQAETGEIKGHYLNAT  
AGTCEEMMKRAVFARELGAPIVMHDYLTGGFTANTSLAFYCRDNGLLLLHIHRAMHAVIDR  
QRNHGMHFRVLAKALRMSGGDH VHAGTVVGKLEGERDVT LGFVDLLRDDYIEKDRSRGVY  
FTQDVSM PGVLPVASGGI HVHMPALTEIFGDDSVLQFGGGTLGH PGNAPGAVANRVALEA  
CVQARNEGRDLAREGNDI IREASKSPELAAACEVKEIKFVFD TIDVL

>P48719

MSPKTETKASVGFQAGVKDYRLTYTTPDYKVS DTDILAAFRVTPQPGVPPEEAGAAVAAE  
SSTGTTT VTDGLTSLDRYKGR CYDLEVPVGEDNQYIAYVAYPLDLFEEGSVTNMFTSIVG  
NVFGFKALRALRLEDLRI PPTS YIKTFQGP HGIQVERDKLNKYGRPLL GCTIKPKLGLSA  
KNYGRAVYECLRGGLDFTKDDENVNSQPFMRDRFVFCAEAIYKAQAETGEIKGHYLNAT  
AGTCEEMIKRAVFARELGVP IVMHDYLTGGFTANTTLAHYCRDNGLLLLHIHRAMHAVIDR  
QKNHGMHFRVLAKALRMSGGDHIHAGTVVGKLEGEREIT LGFVDLLRDDFIEKDRSRGIY  
FTQDVSM PGVMPVASGGI HVHMPALTDIFGDDAVLQFGGGTLGH PGNAPGAVANRVALEA  
CVQARNEGRDLAREGNEVIREAAKSPELAAACEVKEIKFEFESVDTL

>P49080

MQGLAVSCQLPPAAAAARRPRASSNREAVLQCKYEL SQDH YLGGPLRIGQSQGS LHRHR  
STNFLRPA AAAISVEQDEVNTYLPKGDMSVHKFGGTCMGT PKRIQCVANIVLGDSSERKL  
IIVSAMS KVTDMMYNLVQKAQSRDDSYAIALAEVFEKHM TAAKDLLDGEDLARFLS QLHS  
DVS NLRAMLRAIYIAGHATESFSDFVVGHGELSAQMLS YAIKKSGAPCSMDTREV LVVTP  
SGCNQVDPDYLECEKRLQKFSRQPAEII VATGFI ASTAGNIPTTLKR DGSDFSAAIVGSL  
VRARQVTITD VDG VFSADPRKVSEAVILSTLSYQEAEMS YFGANVLHPRTIIPVMKDNI P  
IVIRNMFNLSAPGTMICKQ PANENGDL DACVKS FATVDNLALVNVEGTGMAGVPGTASAI  
FSAVKDVGANVIMISQASSEHSVCFAVPEKEVAVVSAELHDFREALAAGRLSKVEVING  
CSILA AVGLRMAS TPGVSA I LFDALAKANINVRAIAQGCSEY NITVV LKQQDCVRALRAA  
HSRFFLSKTTLAVGIIGPGLIGGALLNQLKNQTAVLKENMNIDL RVIGITGSSTMLLSDT  
GIDLTQKQLLQKEAEPADIGSFVHHLSDNHVFPNKVLVDCTADTSVASHYYDLKKG I HVI  
TPNKKANSGLDQYLKLRTMQRASYTHYFYEATV GAGLP IISTLRGLLETGDKILRIE GI  
FSGTLSYIFNNFEGTRAFSDVVAEAREAGYTEPDRDDL SGT DVARKVVVLARESGLRLE  
LSDIPVKS LVPETLASCSSADEFMQKLPSFDEDARQ RSDAEAAAGEVLR YVGALDAVNRS G  
QVELRRYRRDHPFAQLSGSDNIIAFTTSRYKEQPLIVRGP GAGAEVTAGGVFC DILRLAS  
YLGAPS

>P52426

MAVAELSPCYQTQIVKPPHLSLSNNHKLNL LGLPKASRI TEICCSLAPNQVQTPVAVPTG  
AQSIKPECYGVFCTYDLKKEEETR SKKMITIAISGAAGT ISNHLLFKLASGVVFGPDQPI  
ALKLLGSEKSFHALEGVAMELEDSLYPLLEVSIGIDPYEVFEDAEALLIGAKPRGPGME  
RADLLDINGKIYAEQ GKALNAVASPNVKVIVVGNPCNTNALICLKNPPNI PAKNFHSLTR  
LDENRAK CQLALKAGVFYDKVSNVTIGNHSTTQVPDFVNAQIGGVVPVKEVIKAQKLEEEF  
TEKVRKRGGVLIQKGRSSAASTAVSIVDAINPLITPTPPGDFPSGVYTNGNPNY G I AEDLI



YSMPCRSKGDGDYELVKDVI FDDYLRKRIKTSEEELLAEKRCTAHLTGEGIAVCDLPAGD  
TMLPGEM

>P53780

MTSSLSLHSSFVPSFADLSDRGLISKNSPTS SVSISKVPTEKKQISNRNSFKLNCVMEKSV  
DGQTHSTVNNTTDSLNTMNIKEEASVSTLLVNLDNKFDPFDMSTPLYQTATFKQPSAIE  
NGPYDYTRSGNPTRDALESLLAKLDKADRAFCFTSGMAALS AVTHLIKNGEEIVAGDDVY  
GGS DRLLSQVVPRSGVVVKRVNTTKLDEVAAAIGPQTKLVLESPTNPRQQISDIRKISEM  
AHAQ GALVLVDNSIMSPVLSRPLELGADIVMHSATKFIAGHSDVMAGVLAVKGEKLAKEV  
YFLQNSEGSGLAPFDCLCLRGIKTMALRIEKQQENARKIAMYLSSHPRVKVYVYAGLPDH  
PGHHLHFSQAKGAGSVFSFITGSVALSKHLVETTKYFSIAVSFGSVKSLISMPCFMASHAS  
IPA EVREARGLTEDLVRI SAGIEDVDDLISDL DIAFKTFPL

>P56648

MSPQTETKASVGFKAGVKDYKLTYYTPEYETKPTDILAAFRVTPQPGVPPEEAGAAVA AE  
SSTGTTTVDGLTSLDRYKGRCYHIEPVAGEESQFIAYVAYPLDLFEEGSVTNMFTSIVG  
NVFGFKALRALRLEDLRIPPAYSKT FQGPPHGIQVERDKLNKYGRPLLGCTIKPKLGLSA  
KNYGRAVYECLRGGLDFTKDDENVNSQPFMRRDRFLFCAEAI FKSQAETGEIKGHYLNAT  
AGTCEEMIKRAVFARELGVPIVMHDYLTGGFTANTSLAHYCRDNGLLLHIHRAMHAVIDR  
QKNHGMHFRVLAKALRLSGGDHIHAGTVVGKLEGEREITLGFVDLLRDDFVEKDRSRGIY  
FTQDVSLPGVLPVASGGI HVHMPALTEIFGDDSVLQFGGGTLGHPGNAPGAVANRVALEA  
CVQARNEGRDLAREGNEIIRAASKSPELAAACEVKEIKFEFPAMDTL

>P59381

MAKSIRKINLRKGRRI PRGVTHIQASFNNTIITVTDVIRGQVVSSSAGACGFKGTTKSTP  
FAAQTAENAIRILIDQGMKQAEVMISGPGPRD TALRAIRRSQVLSYVRDVTPIPHNG  
CRPPKKRRV

>P69249

MASSVLSSAAVATRSNVAQANMVAPFTGLKSAASFVSRKQNL DITSIASNGGRVQCMQV  
PPINKKKYETLSYLPDLSQEQLLSEVEYLLKNGVPCLEFETE HGFVYRENNKSPGYDGR  
YTMKLPFMFGCTDATQVLAEEVEEAKKAYPQAIRIIGFDNVRQVQCISFIA YKPEGY

## (2) 50 Mitochondrion proteins

>P05488

MLYISGARLVGDEQVRIASTKIDGIGPKKAIQVRYRLGISGNIKIKELTKYQIDQIEQMI  
GQDHVVHELKRGERADIERLISISYRGIRHQDGSPLRGQRTH TNARTCRKLIRK

>P07924

MSYISGARSLPDEQVRIASTKMDGIGPKKAIQLRYRLGISGNIKMNELTKYQIDQIEQMI  
AQDHVVHELKRGERADIERLISISRYRGIRHQDGSPLRGQRTH TNARTARKQIRK

>P08977

MSYISGARSLPDEQVRIASTKMDGIGPKKAIQLRYRLGISGNIKIHELTKYQIDQIEQMI  
AQDHVVHELKRGERADIERLISISRYRGIRHQDGSPLRGQRTH TNARTARKQIRKGNERR  
LPKEQATD

>P14875

MEKRNIRDHKRRL LATKYELRRKLYKAF CNDPALPSDMRDKHRYKLSKLPRNSSFARVRN  
RCISTGRPRS VYEFFRISRIVFRGLASRGPLMGIKKSS

>P15758

MSYISGARLVADEQVRIASTKMDGIGPKKAIQVRSRLGGNIKRKELTKYQIDQIEQMRGQ

DHVVELKRGERADIERFISISCYRGIHQDGLPLRGQRSHNTARTSRKRIRK  
>P16048  
MALRMASSTANALKLSSSSRLHLSPTFISIRCFNSVLDGLKYAPSHEVKHEGSVATIGIT  
DHAQDHLGEVVFVELPEPGVSVTKGKGFVAVESVKATSDVNSPISGEVIEVNTGLTGKPG  
LINSPPYEDGMIKIKPTSPDELESLLGAKEYTKFCEEEEDAAH  
>P23209  
MLYISGARLVADKQVRIALTKMYGIGPKKAIQVCYRLGISGNIKIKELTKYQIDQMEQMI  
GQDHVVELKRGERADIERFISISCYRGIHQDGLPLRGQRTHNTARTCRKQIRK  
>P25855  
MALRMASSTANALKLSSSVSKSHLSPFSSRCFSTVLEGLKYANSHEVKHEGSVATIGIT  
AHAQDHLGEVVFVELPEDNTSVSKEKSFGAVESVKATSEILSPISGEIEVNTKLTESPG  
LINSPPYEDGMIKVKPSSPAELESMLGPKKEYTKFCEEEEDAAH  
>P26860  
MFSNRRNRLEFHYNQVIRPDLLLKINYENIMEVPRLCKIIVVPKAPSNFIKNVKLAMEIV  
CGQKFIQTRSRGSTGKSFNFVNLNQESKRDTGYVTYLARSTLRGHIMYNFLEKLVITII  
SFYDYPVKIQKNSIQLSMATSLRLFPFIQDHFIEIFEHIRGFDVTIVTSANTQDETVILS  
GFLQKEV  
>P26861  
MEAKFFCFLEIIGVGYKASTNAQGSILYLKLGFSHEIRLQVTPSVRVFCLKPNLICCTGM  
DHQKVTQFAAIVKCKPPEVYKGGKIQRNEI IHKKQGGKK  
>P26862  
MLYPKRTKFRKYQKGRCKGCKADGTQLCFGKYGIKSCEAGRISYQAIEAARRAISRKFRR  
NSKIVRVFADIPITSKPAEVRMGKGGKNTKGIARVLKQILFEMDCVLSNAQQAATLAA  
HKLGLSIKFFKS  
>P26865  
MAQKVNPI SVRLNLRSSDSSFSYGGKLLYQDLNFRDYFGSIRPPTGNTFGFRLGRCI  
IHHPKRTFIHVFFLDRLSQRHQGLGAIPSVKLIRRINDNTVKQRNEVGIPKKRYEYHD  
RLPSIQKIDQLLRVSDMADIHSTFQSI PKDENDDRRASEERYAFSRFAPSILVAVRAEKK  
KAIFGSEGDFFGFTGRAFLDYFVMQYFFNLKNQIQFDPMVNRSPVAQGVAKTSMIGKAIP  
AKTEQGTQSGESICQPRSTLYFDAIIFLRYARFRKATSLSSRYYLKMKQSLFSNQTKTN  
TLIQPVKIASVYQSASLIAQEISKLEQKKSFRQICRSIFKQIKKCPYVKGIRIGCSGRLN  
GAEIAKTECKKYGETSLHVFSQIDYAKTQASTPYGILGVVVSYFLTQKKGTSCAISKT  
YKIS  
>P26866  
MFASRFKVCQILENVQTKKLTLLKQKFLISELQKQKKNKQSDFSIQLOTIKKLSLFYGN  
LPIKMQRAKTHTYIDKKNLLFNIEKRLDVLVRLNFCSTMFQARQLISHKNICVNYKK  
VNIPGFQVSNGLISIQENSLDFFKSNIRKNFQTNRIIRRMKPNHLEVNYKTLKAVVLYEP  
QQIQFPYKIDLDLLD  
>P26869  
MTAKICIVIKSFENQRSGLLNTRKIGLPKKQTLTYTVLRS PHIDKKSREQFEMRIHKQLL  
VIETETHKLRKLNKLHDLGQVKIIFYYQTRLDKVKCS  
>P26872  
MSYILGTNLNSNKQVKIALTRIFGIGPKKAIQVCDQLGLSDTIKVNKLTKYQFDQILKII  
SQNYLVDSELKRVIQRDIKRLISIGCYRGRHNAGLPLRGQRTHNTAKTCRKLRYVSIRS

>P26874

MTRSIKGFVDTCLFKQKKIRRISRRSCILPQFVGCYAQIYNGKGFVGLKITEEMVGHKF  
GEFASTRKTSSLGKRALPSKTKIKPIKKVR

>P27527

MPRRSIKGSFVDAFLLRMKKKRDLLFNRKISRRSSILPEFVDCFVRIYNGKTFVRCKITE  
GKVGHKFGFAFTRKRRPSRTNIGPGRKRGKK

>P27754

MARKGNPISVRLDLNRSSDSSFSYDYYGKSVYQDVNLRSYFGSIRPPTRLTFGFRLGRCI  
ILHFPKRTFIHFFLPRRPRRLKRGKKSRRPGKEKAREFGKVGPIGCLHSNDDTEERNEVG  
GRGAGKRVESIRLDDREKQNEIRIPKKKQGYGYHDRSPS I KKNLSKSLRVSGAFKHPKYA  
GVLNDIAFLIENDDSFRTKTLFKFFFFPKKSRSDGPTSHLLKRTPPAVRPSLNYSVMQYYL  
NTKNQMHFDPVLVNLHFVAPGVAEPSTMGGANRQGRSNELRIRSRIAFFVESSTSEKKSL  
AEDKKGLPHFIRQENDLRFAGRTKTTISLFPFFGATFFFPRDGVGVYKHLFFEDAREQLL  
GQLRIKCKLMGKDKVMELIEKFIDLGGIGELIKGIEIMIEIILRNRRIPYGYNSYLNEVK  
KMRSLLSNRTKTNTIIESVKIKSVYQSASPIAQDISFQPRNKRRSFRSIFSQIVKDIPLV  
MKKGVEGIRICCSGRSKGAEIARTECGKYGKTSRNVFNQKIDYAPAEVSTRYGILGVKVI  
SYSK

>P27928

MARKGNPISVRLDLNRSSDPSRFSYDYYGKSLYQDVNLRSYFSSIRPPTRLTFGFRLGRC  
IILHFPKRTFIHFFLPRRPLRLKRRDKSRPGKDKGRAFGKVGPIGCLHSSEGTEERNEV  
RGRGAGKRVESIDREKQNEIRIPKKMQRYGYHDRTPSRKKNFSKSLRVSGAFKHPKYAGV  
VNDIAFLIENDDSFIKTKLTKLFFFLPKKSRSDGPTSHLLKRTLPAVRPSLNYSVMQYFFN  
TKNKMHFDPVVVNLHFVAPGVAEPSTMGGAKGGLDKRIRSRIAFFVESSTSDKKCLARA  
KKRLIHFIHQANDLRFAGTTKTTISLFPFFGATFFFSDRQDGVGVYNNPFYEYAREQLLQQL  
RIKCRNLMGKDKVMELIEKFIDLGRIGKLIKIEIMMIEIILKRRIPYGYNSYLNEVQKM  
RSFLLSNRTNTNTLIESVKIKSVYQSASLIAQDISFQLRNNPISFRSIFSIVKDIPLIMP  
KGVGIRICCSGRLGGAEIARTECGKYGKTSRNVFNQKIDYAPAEVSTRDGISGVKVRIS  
YSQNKKGRAISETYEI

>P31843

MLELSLRMCIDYRALTKVTIKNKYPIPRVDDLFDRLAQATFTKLDLRSYQVRIAKGDEP  
KTTCTVTRYGSFEFRVMPFGLTNALATFCNLMNVLVEYLDHFVVVYLDLDDLVVYTIYSNSL  
HEHIKHLRVVRESKEIFESD

>P42793

MFPLNFHYEDVLRQDLLLKLNYANVMEVPGLCEIRVVPKAPYNFIIKNGKLAMEIPCGQK  
FIQTQRGSTGKSFRSNPFLGSKDKGYVSDLARQSTLRGHGMSNFLVRIILTVMSLLDFPV  
EIRKNSIQFSMETEFCEFSPELEDHFEIFEHIRGFNVTIITSANTQDETLSSGFLQKDE  
GETQ

>P46254

MASSLALKRFLSSGLLSSSFLRPVASSASRSFNTNAMRQYDQHSDDRNVDVYRHSFPRT  
RDDLLSDVDFDFSPPRSLSQVLNMVDLLTDNPVLSAASRRGDARETEDALFLRLDMPGL  
GKEDVKISVEQNTLTIKGEEGAKESSEEKEKSGRRFSSRIDLPEKLYKIDVIKAEMKNGVL  
KVTVPKMKEEERNVINVKVD

>P46773

MARKGNPISVRLDLNRSSDPSRFSYDYYGKSLYQDVNLRSYFSSIRPPTILTFGFRLGRC

I I L H F P K R T F I H F F L P R R P L R L K R R D K S R P G K D K G R A F G K V G P I G C L H S S E G T E E E R N E V  
R G R G A G K R V E S I D R E K Q N E I R I P K K M Q R Y G Y H D R S P S R K K N F S K S L R V S G A F K H P K Y A G V  
V N D I A F L I E N D G P T S H L L K R T L P A V R P S L N Y S V M Q Y F F N T K N K M H F D P V V L N H F V A P G V  
A E P S T M G G A K G G S L D K R I R S R I A F F V E S S T S E K K C L A R A K K R L I H F I R Q A N D L R F A G T T K  
T T I S L F P F F G A T F F F P R D G V G V Y N N P F F E Y A R E Q L L G Q L R I K C R N L M G K D K V M E L I E K F I  
Y L G R I G K L I K G I E M M I E I I L R K R I I P Y G Y N S Y L N E V Q K M R S F L S N R T N T N T L I E S V K I K S  
V Y Q S A S L I A Q D I S F Q L G N N P I S F R S I F S Q I V K D I P L I M P K G V E G I R I C C S G R L G G A E I A R  
T E C G K Y G K T S C N V F N Q K I D Y A L A E V S T R N G I S G V K V R I S Y S Q N K K G R A I S E T Y E I  
>P46801

M E K H L V M Y L T R K S I M L L R K Y P L V T E F Q V S K C G S H I V K I R R D V L Y P K R T K Y S K Y S K C R C S R  
G C E P D G T Q L G F G R Y G T K S C R A G R L S Y R A I E A A R R A T I G Q F H R A M S G Q F R R N C K I V R V L A D  
L P I T G K P A E V R M G R G K G N P T G I A R V S T G Q I P F E M D G V S L S N A R Q A A R L A A H K P C S S T K F V  
Q S  
>P49359

M A L R I A S S T A N A L R L S S A T R P H S P L S R C F S S V L D G L K Y A N S H E V K H E G S V A T I G I T D H A  
Q D H L G E V V F V D L P E A G G S V T K A T G F G A V E S V K A T S D V N S P I S G E I V E V N S K L S E T P G L I N  
S S P Y E D G M I K V K P S N P S E L D S L M G A K E Y T K F C E E E D S A H  
>P49360

M A L R M A S S T A N A L R L S S A T R P H Y S P L S R C F S S V L D G L K Y A N S H E V K H E G S V A T V G I T D H A  
Q D H L G E V V F V D L P E A G G S V T K A T G F G A V E S V K A T S D V N S P I S G E I V E V N S K L S E T P G L I N  
S S P Y E D G M I K V K P S N P S E L D S L M G A K E Y T  
>P49361

M E R A R R L A N K A I L G R L V S Q T K H N P S I S S P A L C S P S R Y V S S L S P Y V C S G T N V R S D R N L N G F  
G S Q V R T I S V E A L K P S D T F P R R H N S A T P E E Q T K M A E F V G F P N L D S L I D A T V P K S I R L D S M K  
Y S K F D E G L T E S Q M I A H M Q D L A S K N K I F K S F I G M G Y N T S V P T V I L R N I M E N P G Y T Q Y T P Y  
Q A E I A Q G R L E S L L N F Q T M V T D L T G L P M S N A S L L D E G T A A A E A M A M C N N I Q K G K K K T F I A  
S N C H P Q T I D I C K T R A D G F D L K V V T S D L K D F D Y S S G D V C G V L V Q Y P G T E G E L L D Y S E F I K N  
A H A N G V K V M A S D L L A L T I L K P P G E L G A D I V V G S A Q R F G V P M G Y G G P H A A F L A T S Q E Y K R  
M M P G R I I G V S V D S S G K P A L R M A M Q T R E Q H I R R D K A T S N I C T A Q A L L A N M A A M F G V Y H G P E  
G L K T I A K R V H G L A G T F A A G L K K L G T V Q V Q D L P F F D T V K V T C V D S K A I A E E A Y K H K M N L R I  
V D K N T I T V A F D E T T T I E D V D T L F K V F A L G K P V T F T A A S I A P E V Q D A I P S G L V R E T P Y L T H  
P I F N M Y H T E H E L L R Y I S K L Q S K D L S L C H S M I P L G S C T M K L N A T T E M P V T P A F A D I H P F A  
P T E Q A Q G Y Q E M F K N L G D L L C T I T G F D S F S L Q P N A G A A G E Y A G L M V I R A Y H M A R G D H H R N V  
C I I P V S A H G T N P A S A A M C G M K I I T V G T D S K G N I N I E E L R K A A E A N K E N L S A L M V T Y P S T H  
G V Y E E G I D E I C K I I H D N G G Q V Y M D G A N M N A Q V G L T S P G I G A D V C H L N L H K T F C I P H G G G G  
P G M G P I G V K K H L A P Y L P S H P V V A T G G I P A P E Q S Q P L G T I A A A P G S A L I L P I S Y T Y I A M M G  
S Q G I T N A S K I A I L N A N Y M A K R L E N H Y P I L F R G V N G T V A H E F I V D L R P L K T T A G I E P E D V A  
K R L I D Y G F H G P T M S P V P G T L M I E P T E S E S K A E L D R F C D A L I S I R Q E I A E I E K G N V D L N N N  
V I K G A P H P P Q L L M A D K T K P Y S R E Y A A Y P A P L R A A K F P T T C R V D N V Y G D R N L I C T L Q P P Q E  
Y E E K A E A T A  
>P49362

M E R A R R L A I L G R L V S Q T K H N P S I S S P A L C S P S R Y V S S L S P Y V C S G T N V R S D R N L N G F G S Q  
V R T I S V E A L K P S D T F P R R H N S A T P E E Q T K M A E F V G F P N L D S L I D A T V P K S I R L D S M K Y S K  
F D E G L T E S Q M I A H M Q D L A S K N K I F K S F I G M G Y N T S V P T V I L R N I M E N P G Y T Q Y T P Y Q A E  
>P49362

IAQGRLESLLNFQTMITDLTGLPMSNASLLDEGTAAAEAMAMCNNIQKGKKKTFIIASNC  
HPQTIDICKTRADGFDLKVVTSDLKDFDYSSGDVCGVLVQYPGTEGELLDYSEFIKNAHA  
NGVKVVMASDLLALTILKPPGELGADIVVGSAQRFVPMGYGGPHAAFLATSQEYKRMP  
GRIIGVSVDSGKPALRMAMQTRQHIRRDKATSNICTAQALLANMAAMFGVYHGPEGLK  
TIAKRVHGLAGTFASGLKKLGTVQVQDLPPFFDTVKVTCADSKAIAEEAYKHKMNLRIVDK  
NTITVAFDETTTIEDVDTLFKVFALGKPVFTTAASIAPEVQDAIPSGLVRETPYLTHPIF  
NMYHTEHELLRYISKLQSKDLSLCHSMIPLGSCMKNLNTATEMMPVTPAFADIHPFAPTE  
QAQGYQEMFKNLGDLLCTITGFDSFSLQPNAGAAGEYAGLMVIRAYHMARGDHRNVCII  
PVSAHGTPASAAAMCGMKIITVGTDSKGNINIEELRKAEEANKENLSALMVYTPSTHGVY  
EEGIDEICKIIHDNGGQVYMDGANMNAQVGLTSPGIGADVCHLNHKTFCIPHGGGGPGM  
GPIGVKHLAPYLPSPVPTGGIPAPEQSQPLGTIAAAPGSALILPISYTIAMMGSQG  
ITNASKIAILNANYMAKRLNHYPIFRGVNGTVAHEFIVDLRPLKTTAGIEPEDVAKRL  
IDYGFHGTMSVPVPTLMIEPTESKAELEDRFCDALISIRQEI AEIEKGNVDFNNNVIK  
GAPHPQLLMADKTKPYSREYAAYPAPLRAAKFPTTCRVDNVYGDRNLICTLQPPQEYEE  
KAEATA

>P49363

MRGGLQLGQSI TRRLGQSDKKT IARRCYASEADLKKTVLYDFHVANGGKMVPFAGSMP IQ  
YKDSIMESTINCRENGSLFDVSHMCGLSLKGKDCVPFLEKLVVADVAGLRPGTGSALT VFT  
NEKGGAI DSVITKVTDDHIYLVVNAGCRDKDLAHEEHMKAFKAKGGDVSHIYDERSLL  
ALQGPLAGSTLQHLTKEDLSKMYFGDFRIIDINGSKCFLTRTGYTGEDGFEISVPSENA  
DLAKAILEKSEGKVRILTGLGARDSLRLEAGLCLYGNDMEQHITPVEAGLTAIGKRRRAEG  
GFLGADVILKQIADGPAIRRVGLFSTGPPARSHSEIQNEKGENIGEVTSGGFSPCLKKNI  
GMGYVKSGLHKPGTKLKIVIRGKTYEGSVTKMPFVPTKYKPA

>P49386

MARKGNPISVRLGKNRSDSSRFSEY YGKFVYQDVNLRSYFGSIRPPTRLTFGFRLGRC  
ILLHFPKRTFIHFFLPRRPRRLKRREKTRPGKEKGRTTPGKAGPIGCLRDDTEERNEVR  
GRGARKRVESIRLDDRKKQNEIRGPKKKQRYGYHRTPSIKKNLSKSLRISGAFKHPKYG  
GVVNDIAFLIENDDSRKTKLKF KFFPKKSRSDGPTSYLRTLPAVGPSLNFVLMQYFFNT  
KNQMNFDPVVVLNHFVAPGAAEPSTMGRANGTGDRSLQKRIRSRIAFFVESSTSEKKCLA  
EAKNRLTHLIRLANDLGFA GTTKTTISLFPFFGATFFF LRDGVGVTTNNLDAREQLLNQLR  
VKCNLLGKDKVMELIEKFKDLGGIEELIKVIDMMIEIILRKRGI PYGYNSYFNEVQKMRS  
FLSNRTNTKTLIESVKIKSVYQSASLIAQDISFQLKNKRRSTHSIFAKIVKEIPKRVEGI  
RICFSGRLKDAAEKAQTKCYKHKRKT SRNVFNQKIDYAPAEVSTRYGISGVKVISYSQKKG  
GRAISETYEI

>P49387

MSEKQNSRDHKRRLLA AKFELRRKLYKAFCKDPDLPSDMRDKHRYKLSKLPRNSSFARVR  
NRCISTGRPRSVSEFFRIYRIVFRGLASRGLMGIKSS

>P49388

MFPLNFHYEDVSRQDPLLNRITPTLKF LGSCEIRVVPNGPYNFIIKNGKLAMEIPRGQKF  
IQTQRGSTGKSFRSNPFLGSKDKGYVSDLARQSTLRGHGMSNFSVRISTVMSLLDPFVE  
IRKNSIQFSMETEFCEFA PQLQDHFEIFEHIRGFNVTVTSANTQDETLP LSGFLQKDEG  
ETQ

>P49389

MYLTRKSIMLLRKYLLVTESQVSKCGFHIVKKKGDVLYPKRRTKYSGRCSRGCCKPDGTKL

GFGRYGTKSCRAGRLSYRAIEAARRATIGHSFRRAMSGQFRRNCKIVRVLADLPITGKPA  
EVRMGRGKGNPTGIARVSTGQIPFEMDGVSLANARQAARLAAHKPCSSTKQVQS

>P50433

MAMAIALRRLSATVDKPVKSLYNGGSLYMSLNEAVYDKEKSGVAPKQLNAPLEVVDP  
EIADIEHEKARQKGLELIPSENFSTSVSMQAVGSVMTNKYSEGYPGARYYGGNEYIDMA  
ETLCQKRALEAFRLDPAKGVNVQPLSGSPANFQVYTALLKPHERIMALDLPHGGHLSHG  
QTDTKKISAVSIFFETMPYRLDESTGYIDYDQLEKSATLFRPKLIVAGASAYARLYDYDR  
IRKVCNKQKAILLADMAHISGLVAAGVIPSFDYADVVTTHKSLRGPRGAMIFYRKGV  
KEVKNQKQKQVYDYEDKINQAVFPGLQGGPHNHTITGLAVALKQATTPEYRAYQEQLSN  
SSKFAQALGEKGYELVSGGTDNHLVLVNMKNKIDGSRVEKVLEAVHIAANKNTVPGDVS  
AMVPGGIRMGTALTSRGFLEEDFVKVADFFDAVKIAVKVKAETQGTCLKDFVATLESS  
APIKSEIAKLRHDVEEYAKQFPTIGFEKETMKYKN

>P51409

MDQLMFLYFHYEDVLRQDLLLKLNYANVMEVPLCKIIVVPKTAPSIKNGKLAMEISCG  
QKLKQRASTGKSFRSNPFLGSKNDKKGYSVDLARQSTLRGHGMSHFLVRISTVMSLLDSP  
LEIRERSIQFSMETEFCEFSPELEDHFEIFEHIRGFNVTVTSANTQDETLLLSGFLQKD  
EGETQ

>P54260

MRGGLQLGQSITRRLAQADKKTIGRRCFASDADLKKTVLYDFHVNVGGKMPFAGSMPIQ  
YKDSIMDSTVNCRENGSLFDVSHMCGLSLKGKDTIPFLEKLVIADVAGLAPGTGSLTVFT  
NEKGGAIDDSVVTKVTNDHIYLVNAGCRDKDLAHEEHMKSFKSKGGDVSHIHRSLL  
ALQGPLAAPVLQYLTKDDLKMYFGEFRVLDINGAPCFLTRTGYTGEDGFEISVPSINAL  
DLAKALLEKSEGKIRLTGLGARDSLRLEAGLCLYGNDMEQHPTTPEAGLTAIGKRRRAEG  
GFLGAEVILKQIEEGPKIRRVGFFSSGPPPRSHSEIQDSNGQNIQEITSGGFSPCLKNI  
AMGYVKTGNHKAGTNVKIVIRGKSYDGVVTKMPFVPTKYYKP

>P92557

MGGLDGEQKLLIKKLVNFRMKEGKRTRVRAIVYQTFHRPARTERDVIKLMVDAVENIKPI  
CEVAKVGVAGTIYDVPGIVARDRQQTLAIRILEAAFKRRISYRISLEKCSFAEILDAYQK  
RGSARRKRENLHGLASTNRSFAHFR

>P92969

MRNILGRASLRKVKFLSDSSSSGTHYPVNRVRGILSSVNLGVRNGLSINPVNEMGGLSS  
FRHGQCYVFEGYATAAQAIIDSTDPEDSSGSDEVNELITEMEKETERIRKKARLAAIPPK  
RVIAGMGAQKFYMLKQRQVKMETEEERAARECREILADMCEQKLAPNLPYMKSLFLGFEP  
VRNAIQDDLDTFKIKKGIKYAPFMEQLPADKMAVITMHKMMGLLMTNAEGVIVKLVNA  
ATQIGEAVEQEVRIINSFLQKKNKNATDKTINTEAENVSEEIVAKETEKARKQVTVLMEK  
NKLQVKALVRKHDSFKPGQEAQVKVGARLIQLLMENAYIQPPAEQFDDGPPDIRPAFKQ  
NFRVTLENTKTSRRYGCIECDPLVLKGLDKSARHMVIPPYLPMLIPPQNTGYDQGAHFLL  
PSYVMRTHGAKQQRVTMVRTPKQLEPVYEALDTLGNTEKINKKVLSDVRIANGGRIGG  
LVDREDVPIPEEPEREDQEKFKNRESKKAIKQNNERHSQRCDIELKLEVARMKMDEEGFY  
YPHNVDGRGRAYPIHPYLNHLGSDLCRGILEFCEGKPLGKSGRLKIHIANLYAGGVDKL  
AYEDRIAFTESHLEDIFDSSDRPLEGKRLNAEDPFQCLAACINLSEALRSPFPEAAISHI  
PIHQDGSCNGLQHAAALGRDKLGADAVNLVTGEKPADVYTEIAARVLKIMQQDAEEDPET  
FPNATYAKLMLDQVDRKLVKQTVMTSVYGVVTSYGARDQIKKRLKERGTFFEDSLTFHASC  
YAAKITLKALEEMFEAARAIKSFQDCAKIIASENNAVCTTPLGLPVVQPYRKPGRHLVKT

TLQVLTLSRETDKVMARRQMTAFAPNFIHSLDGSMMMMTAVACNRAGLSFAGVHDSFTHA  
CDVDVMNTILREKFVELYEKPILENLLESFQKSPDISFPPLPERGDFDLRKVLESTYFF  
N

>P93255

MALRMASAAANALGVSCAPKSHLLPALSLSRCFSTVLDGLKYASSHEVKHGGSVATIGIT  
DHAQGHLGDVVFAELPEGGAVSAGKPFASVESVKATSDVNSPISGEIVEVNTKLSDSPGL  
LNSSPYEEGMVKVKPSNPAELESMLGMSKEYTKFCEEEEDAH

>P93256

MRGGGLQLGQSVTRRLAQAEKKVIARRCFASEADLKKTALYDFHVANGGKMVPFAGSMP  
QYKDSIMDSTINCRENGSLFDVAHMCGLSLKGDKCI PFLEKLVVGDIAGLAPGTGTLVSL  
TNEKGGAIDDTVITKVTDDHIYLVNAGCREKDLAHEEHMKAFKAKGGDVSHIHDERSL  
LALQGPLAAPVLQHLTKEDLSKFYFGQFTFLDINGFPCYLTRTGTYTGEDGFEISVPNEYA  
VDLAKAMLEKSEGVRLTGRGARDSLRLEAGLCLYGNDLEQHITPIEAGLTAVGKRRRAE  
GGFLGAEVILKQIADGPPQRRVGFISGPPARGHSEIQNEKGESIGEITSGGFSPLKKN  
IAMGYVKSNGHKAGTKVNILVRGKPYEGVVTKMPFVPTKYKSP

>P93311

MRPGRARALRQFTLSTGKSAGRNSGRITVFHRGGGSKRLLRRI DLKRSTSSMGIVESIE  
YDPNRSSQIAPVRIKGGCQKKMNTIEKFAPPRKILEPTTNTISGLFSFSFLPGKVDKRV  
ACFSPGLMAAYVVVGLPTGMPPLSSSKSAFASKGAGSTKTLVKDVFFSAFSSPKAKRETA  
SLAFASSFGFPRIAVAGAKPAFFAPRMRQKVRGKSTFSLCEVQKGRTHSILAHRIKKGAG  
LSQSFRRQDTLGLVGAAGHKSKPKTDQGNLPAKPIGERAKQLKALRGLRAKDGACKVDR  
APVTYIIASHQLEAGKMVMNCDSKPSTSSFLQSAQN DHPKPLFTV

>Q01899

MAAVLRSLRRRDVASATFSAYRSLTGSTKPAYVAQKSCLARPFSSRPAGNDVIGIDLGT  
NSCVSVMEGKNPKVIENSEGARTTPSVVAFNQK GELLVGTPAKRQAVTNPNTVFGTKRL  
IGRRFDDPQTQKEMKMPFKIVKAPNGDAVEANGQQYSPSQIGAFVLTKMKETA EAYLGK  
SVSKAVITVPAYFNDAQRQATKDAGRIAGLDVQRI INEPTAAALSYGMNKEGLIAVFDL  
GGGTDFVSILEISNGVFEVKATNGDTFLGGEDFDNALLDFLVNEFKRTESIDLSKDR LAL  
QRLREAAEKAKIELSSTSQTEINLPFITADASGAKHLNITLTRSKFEALVNHLIERTKAP  
CKSCLKDANVSIKDVDEVLVGGMTRVPKVQEVV LNI F GKSPSKGVNPDEAVAMGAAIQG  
GILRGDVKELLLLVDVTPLSLGIETLGGIFTRLINRNTTIPTKKSQVFSTAADNQTQVG I K  
VLQGEREMASDNKMLGEFDLVGIPAPRGLPQIEVTFDIDANGIVTVSAKDKSTGKEQQI  
TIRSSGGLSEDEIEKMOVKEAELHAQKDQERKTLIDIRNSADTTIYSIEKSLGEYREKIPS  
ETAKEIEDAVSDLRKAMSGDNVDEIKSKLDAANKAVSKI GEHMSGGSSGGSSAGGSQGGG  
DQAPEAEYEEVKK

>Q01902

MGDFDGEQKELIKKLVNFRMIDGKRTRVRAIVYKTFHRLARTERDVIKLMVDAVDNIKPI  
CEVVKVG VAGTIYDVP GIVARDRQQTLAIRILGAAFKRRISYRISLEKCSFAEILDAYRK  
RGISRKRRENHGLASTNRSFAHFR

>Q04715

MLLRKYLLVTESQVSKCGFLIVKKKRDVLYPKRTKYSKYRKGRCSRGC KPDGTQLGFGRY  
GTKSCRAGRLSYRAIEAARRAIGHFHRAMSGQFRRNGKIVRVLADIPITGKPTEV RMGR  
GKGNPTGIARVSRGQILFEMDGVSLSNARQALH

>Q05045

MHRFATGLASKARLARNGANQIASRSNRRNYAAKDVKFGVEARGLMLKGVEDLADAVKVT  
MGPKGRTVVIEQSFQAPKVTGDGVTVAKSIEFKDKVKNVGASLVKQVANATNDVAGDGT  
CATILTKAIFTEGCKSVASGMNAMLRRGISMAVDSVVTNLKSRARMISTSEEIAQVGTI  
SANGEREIGELIAKAMEKVGKEGVITISDGKTMNELEVVEGMKLDRGYISPYFITNQKN  
QKCELDPLIIIEYKISSINAVVKVLELALKKQRPLLIIVSEDEVSEALATLILNKLKLAG  
IKVCAIKAPGFGENRKAGLQDLAVLTGGQVITEELGMNLEKVDLDMLGSCCKITISKDDT  
VILDGAGDKKAIIEERCQIRSGIEASTSDYDKEKLQERLAKLSGGVAVLKIGGASEAEV  
EKKDRVTDALNATKAAVEEGIVPGGGVALLYASKELDKLPTANFDQKIGVQIIQNALKTP  
VHTIASNAGVEGAVVVGKLEQDDPDLGYDAAKGEYVDMVKAGIIDPLKVIRTALVDAAS  
VSSLMTTTEVVVVVELPKDENEVPAMGGGMGGMDY

>Q84LB6

MLRKLANSLSVAGKQQQLRRLNIHEYQGAELMSKYGINVPGKGVAVASLDEVKKAIQDV  
FPNQSEVVVKSQVLGGRGLGTFKNGFQGGVHIVKADQAEDIASKMLGQILVTKQTGAQG  
KVVSKVYLCEKMSLVNEMYFSIILDRATAGPLIIACRKGGSIEDLAEKFPDMIKVPID  
VFKGISDADAQVVDGLAPKVADRNDSEIQVKKLYKLCETDCTMLEINPLAETS DNKLV  
AADAKLNFDDNAAAYRQKEIFSLRDSSEDPREVAAAKADLNYIGLDGEIGCMVNGAGLAM  
ATMDIIKLGHGGTPANFLDVGGNATEGQVVEAFKILTADEKVKAILVNI FGGIMKCDVIAS  
GIVNAAKQVQLKVPVIVRLEGTNVEQGKRILKESGMKLI TAEDLDDAAEKAVKALA

>Q8H107

MMRAVIRRAASNGSSPSLFAKSLQSSRVAASSPSLLSGSETGAYLHRGNHAHSFHNLAL  
PANGSGISRSASLVSTLQVRPFS AETGDTVEAVVPHMGESITDGTLATFLKKPGERVQ  
ADEAIAQIETDKVTIDIASPASGVIQEFVNEGDTVEPGTKVAII SKSEDTASQVTPSQK  
IPETTDTKPSPAEDKQKPRVESAPVAEKPKAPSSPPPKQSAKEPQLPKERERRVPM  
RLRKR VATRLKDSQNTFALLTTFNEVDMTNLMKLR SQYKDAFYEKHGVKGLMSGFIKAA  
VSALQHQPVVNAVIDGDDIIYRDYVDISIAVGT SKGLVVPVIRGADKMNFAEIEKTINSL  
AKKANEGTISIDEMAGGSFTVSNGGVYGSLISTPIINPPQSAILGMHSIVSRPMVVGGSV  
VPRPMYVALTYDHRLIDGREAVYFLRRVKDVVEDPQRLLLDI

>Q9MF82

MGGLDSEQQLIKKLVNFHMKEGKRTKVRAIVYQTFHRLARTEGDVIKLMIDAVENIKPI  
CKVEKVRVAGTIYDVP GIVARDRQQT LAIRILEAAFRRISYRISLEKCLFDEILDAYRK  
RGISRKKREN LHGLASANRSFAHFR

>Q9SIB9

MYLTASSASSSIIRAASSRSSLFSFRSVLSPSVSSTSPSSLLARRSFGTISPFRSH  
SFHSPSPFRFTSQIRAVSPVLDRLQRTFSSMASEHPFKGIFTTLPKPGGGEFGKFYSLP  
ALNDPRVDKLPYSIRILLES AIRNCDNFQVTKEDVEKIIDKTS PKQVEIPFKPARVLLQ  
DFTGVPVAVDLACMRDAMNKLGS DSNKINPLVPVLDLVIDHSVQVDVARSEN AVQANMELE  
FQRNKERFAFLKGSTAFQNM LVPPGSGIVHQVNLEYLGRVVFNTKGLLYPDSVVGTD SH  
TTMIDGLGVAGGVGGIEAEATMLGQPM SMVLPGVVGFKLAGKMRNGVTATDLVLTVTQML  
RKHGVVGFVFEFYNGMSGLSLADRATI ANMSPEYGATMGFFPVDHVTLQYLKLTGRSDE  
TVAMIEAYLRANMFVDYNEPQQDRVYSSYLELNLDDVEPCISGPKRPHDRVTLKEMKAD  
HSCLD SKVGFKGFAIPKEAQEKVNF SFDGQPAELKHGSVIAAITSCTNTSNPSVMLGA  
GLVAKKACDLGLQVKPIKTS LAPGSGVVTKYLLKSGLQEYLNEQGFNIVGYGCTTCIGNS  
GEINESVGAAITENDIVAAVLSGNRNFEGRVHPLTRANYLAS PPLVVAYALAGTVNIDF  
ETEPIGKGNKGDVFLRDIPTTEEIAEVVQSSVLPDMFRATYESITKGNPMNKLSVPENT



LYSDPNSTYIHEPPYFKDMTMDPPGPHNVKDAYCLLNFGDSITTDHISPAGNIQKDSPAA  
KFLMERGVDRKDFNSYGSRRGNDEIMARGTFANIRIVNKLNMNGEVGPKTVHIPSGEKLSV  
FDAAMRYKSSGEDTIILAGAEYGSRSSRDAAKGPMLOGVKAVIAKSFERIHRSNLVGMGI  
IPLCFKSGEDADTLGLTGHERYTIHLPTDISEIRPGQDVTVTDDNGKSFTCTVRFDTEVE  
LAYFNHGGILPYVIRNLSKQ

>Q9ZT91

MASVVLRNPSKRLVPFSSQIYSRCGASVTSSYSISHSIGGDDLSSSTFGTSSFRSMATF  
TRNKPHVNVGTIGHVDHGKTTLTAAITKVLAEEGKAKAIAFDEIDKAPEEKRGITIIATA  
HVEYETAKRHYAHVDCPGHADYVKNMITGAAQMDGGILVVSGPDGPMPQTKEHILLARQV  
GVPSLVCFLNKVDVDDPELLELVEMELRELLSFYKFPGDDIPIIRGSALSALQGTNDEI  
GRQAILKLMDAVDEYIPDPVRVLDKPFLMPIEDVFSIQGRGTVATGRIEQGVIKVGEEVE  
ILGLREGGVPLKSTVTGVEMFKKILDNGQAGDNVGLLLRGLKREDIQRGMVIAKPGSCKT  
YKKFEAEIYVLTKDEGGRHTAFFSNYRPQFYLRADITGKVELPENVKMVMPGDNVTAVF  
ELIMPVPLETGQRFALREGGRTVGAGVVSKVMT
