# Supplementary material for: iLoc-Plant: a multi-label classifier for predicting the subcellular localization of plant proteins with both single and multiple sites
Source: Royal Society of Chemistry journal article supplement (doi:10.1039/c1mb05232b), 2011-10-10
Supplement: c1mb05232b_4.pdf [file c1mb05232b_4.pdf]

**Online Supporting Information S2c.** Dataset used to demonstrate the power of **iLoc-Plant** in identifying proteins for their multiple locations. The dataset contains 17 independent multiple-location proteins randomly picked from Swiss-Prot database (Release 2011\_06 of 31-May-11); none of them occurs in the training dataset of **iLoc-Plant**.

---

>O64645

MVRGKTQMKRIENATSRQVTFKRRNGLLKKAFELSVLCDAEVSLIIFSPKGKLYEFASS  
NMQDIDRYLRHTKDRVSTKPVSEENMQHLKYEAANMMKKIEQLEASKRKLLGEGIGTCS  
IEELQQIEQQLEKSVKCI RARKTQVFKEQIEQLKQKEKALAAENEKLSSEKGSHESEVSNK  
NQESTGRGDEESSPSSEVETQLFIGLPCSSRK

>O82794

MAREKIRIKKIDNITARQVTFKRRRGIFKKADEL SVLCDADVALIIFSATGKLF EFSSS  
RMRDILGRYSLHASNINKLMDPPSTHLRLENCNLSRLSKEVEDKTKQLRKLRGEDLDGLN  
LEELQRLEKLLLESGLSRVSEKKGECVMSQIF SLEKRGSELVDENKRLRDKLETLERAKLT  
TLKEALETESVTTNVSSYDSGTPLEDDSDTSLKLG LPSE

>P68395

QAEIIDQLVRLFAHGTGDYKCNASRIPQLSPDQILKQLTVLTLAESNKKADNMSEIDKKE  
AEEGVEELK

>P93002

MDTTIDGFADSYEISSTSFVATDNTDSSIVYLAAEQVLTGPDVSALQLLSNSFESVFDSP  
DDFYSDAKLVLSDGREVSFHRCVLSARSSFFK SALAAKKEKDSNNTAAVKLELKEIAKD  
YEVGFDSVVTVLAYVYSSRVRPPP KGVSECADENCCHVACRPAVDFMLEVLYLAFIFKIP  
ELITLYQRHLLDVVDKVVIEDTLVILKLANICGKACMKLLDRCKEIVKSNVDMVSLEKS  
LPEELVKEIIDRRKELGLEVPKVKKHVSNVHKALDSDDIELVKKLLKEDHTNLDDACALH  
FAVAYCNVKTATDLLKLDLADVNRNPRGYTVLHVAAMRKEPQLILSLLEKGASASEATL  
EGRTALMIAKQATMAVECNNIPEQCKHSLKGRLCVEILEQEDKREQIPRDVPPSFAVAAD  
ELKMTLLDLENRVALAQRLFPT EAQAAMEIAEMKGTCEFIVTSLEPDRLTGTKRTSPGVK  
IAPFRILEEHQSRLKALSKTVELGKRFFPRCSAVLDQIMNCEDLTQLACGEDDTAEKRLQ  
KKQRYMEIQETLKKAFSEDNLELGNSSLTDSTSSTSKSTGGKRSNRKLSHRRR

>Q7XTE8

MSAQAELSREENVYMAKLAEQAERYEEMVEFM EKVAKTVDSEELTVEERNLLSVAYKNVI  
GARRASRIISSIEQKEESRGNEDRVTLIKDYRGKIETELTKICDGILKLLSHLVPSSSTA  
PESKVFYLMKMGDYRYLAEFKTGAERKDA AENTMVAYKAAQDIALAELPPTHPIRLGLA  
LNFSVFYYEILNSPDRACNLAKQAFDEAISELDTLSEESYKDSTLIMQLLRDNLTLTSDI  
SEDTAEEIREAPKRDSSEGQ

>Q6ZKC0

MSREENVYMAKLAEQAERYEEMVEYMEKVAKTVDVEELTVEERNLLSVAYKNVIGARRAS  
RIVSSIEQKEEGRGNEEHVTLIKEYRGKIEAELSKICDGILKLLDSHLVPSSSTA AESKVF  
YLMKMGDYHRYLAEFKTGAERKEAAESTMVAYKAAQDIALADLAPTHPIRLGLALNFSVF  
YYEILNSPDKACNLAKQAFDEAISELDTLGEESYKDSTLIMQLLRDNLTLTSDLTEDGGD  
EVKEASKGDACEGQ

>Q06967

MSPA EASREENVYMAKLAEQAERYEEMVEFMEKVAKTTDVGELTVEERNLLSVAYKNVIG  
ARRASRIISSIEQKEESRGNEAYVASIKEYRSRIETELSKICDGILKLLDSHLVPSATAA  
ESKVFY LKMKGDYHRYLAEFKSGAERKEAAENTLVAYKSAQDIALADLPTTHPIRLGLAL  
NFSVFYYEILNSPDRACNLAKQAFDDAIAELDTLGEESYKDSTLIMQLLRDNLTLTSDNA  
EDGGDEIKEAAKPEGEGH

>Q94BT6

MEDSGSDL SADDASSLADDEEGGLFPGGGPIPYVGNLLHTAPCGFVVTDAVEPDQPIIY  
VNTVFEMVTGYRAEEVLGGNCRFLQCRGPFARRRHLVDSMVVSEIRKCIDEGIEFQGEL  
LNF RKDGSPLMNRLRLTPIYGDDDTITHIIGIQFFIETDIDLGPVLGSSTKEKSIDGIYS  
ALAAGERNVSRGMCGLFQLSDEVVSMKILSRLTPRDVASVSSVCRRLYVLTKNEDLRRVC  
QNAGSETTRVLETVP GAKRLGGRLARELTTLEAAARKLSVGGSVEPSRCNF SACAVGNRV  
VLF GGEGVNMQPMNDTFVLDLNSDYPEQHVKVSSPPPGRGHTLTCVNGSNLVVFGGCGQQ  
GLLNDV FVLNLD AKPPTREISGLAPPLPRSHSSCTLDGTKLIVSGGCADSGVLLS DTFLL  
DLSIEKPVREIPAATPPSRLGHTLSVYGGRKILMFGGLAKSGPLKFRSSDVF TMDLSEEE  
PCRCVTGSGMPGAGNPGGVAPPRLDHVAVNLPGGRIILIFGGSVAGLHSASQYL LLDPTE  
DKPTRILNIPGRPPRFAGHGTCVVGGTTRAIVLGGQTGEEMLSLHEL S LASYL T

>Q9CA64

MSGRRSRSRQSSGTSRI SEDQINDLI IKLQQLPELRDSRRSDKVSAARVLQDTCNYIRN  
LHREVDDL SERLSELLANS DTAQAALIRSLLTQ

>Q9C9M7

MSKSGDNQPVDRYLRRQILGEGTYGVVYKATDTKTGKT VAVKKIRLGNQKEGVNFTALRE  
IKLLKELNHPHIVELIDAFPHDGS LHLVFEYMQTDLEAVIRDRNIFLSPGDIKSYMLMTL  
KGLAYCHKKVLHRDMKPNLLIGENGLLKLADFG LARLFGPSNRRFTHQVFATYRAPELL  
FGSRQY GAGVDVAAGCIFAELLLRRPFLPGSTEIDQLGKIFQAFGTPVPSQSDMIYLPDY  
MEFSYTPAPPLRTIFPMASDDALDLLAKMFIYDPRQRITIQQALDHRYFSSSPSPTEPGK  
LQIPASKGDALEPKASEQNQHGN SPAVLSPPGKMRRVMGPEGFT

>Q9SUQ2

MEAEKMMVLPRIKFTEHKTNTTTIVSEL TNTHQTRILRISVTD PDATDSSSDDEEEEHQR  
FVSKRRRVK KVFVNEVYLD SGAVVTGSCGQMESKKRQKRAVKSESTVSPVVSATTTTTTGEK  
KFRGVRQRPGKAAEIRDPLKRVLLGTYNTAE EAMVYDNAAIQLRGPDALTNFSVTPTT  
ATEKKAPPPSPVKKKKKNNKSKKSVTASSSISRSSNDCLCSPVSVLRSPFAVDEFSGI  
SSSPVA AVVVKEEPSMTTVSETFSDFSAPLFSDDDVFDFRSSVVPDYLG GDLFGEDLFTA  
DMCTDMNFGDFGSGLS SHMEDHFQDIGDLFGSDPLLAV

>Q9SUE3

MMMDEFMDLRPVKYTEHKT VIRKYTKSSMERKTSVRDSARLVRSMTDRDATDSSSDEE  
EFLFPRRRVKRLINEIRVEPSSSSTGDVSASPTKDRKRINVDSTVQKPSVSGQNQKKYRG  
VRQRPGKAAEIRDPEQRRRILGTFATAEEAAI VYDNAAIKLRGPDALTNFTVQPEPEPVQ  
EQEQEPESNMSV SISESMDDSQHLSSPTSVLNYQTYVSEEPIDSLIKPVKQEFLEPEQEP  
ISHLGEGNTNTNDDSFPLDITFLDNYFNESLPDISIFDQPMSP IQPTENDFNDLMLFDS  
NAEYYSSSEIKEIGSSFNDLDDSLISDLLLV

>Q9M374

MERRTRRVKFTENRTVTNVAATPSNGSPRLVRITVTDPFATDSSSDDDNNNVTVVPRVK  
RYVKEIRFCQGESSSSTAARKGKHKEEESVVVEDDVSTSVKPKKYRGVRQRPGKFAAEIR  
DPSSRTRILGTFVTAEEAAIAYDRAAIHLKGP KALTNFLTPPTPTPVIDLQTVSACDYGR

DSRQSLHSPTSVLRFNVNEETEHEIEAIELSPERKSTVIKEEEEESAGLVFPDPYLLPDL  
SLAGECFDTEIAPDLLFLDEETKIQSTLLPNTEVSKQGENETEDFEFGLIDDFESSPDVD  
HFFDHHHSFD

>Q0IMG9

MAGDRAEEEEGEAPPPEARAAAVERVAAAVEAVAAGAGAGAGEYRNAYRRQLLALSRI  
RLLGPFVEELRERRRGEGEGERALAPLADALEAALALLRLGREGSRISLVLERDSVM  
KKFQGVILQLEQALCDIPYNELDISDEVREQVELVHAQLKRAKERIDMPDDEFYNDLLSV  
YDKNYDPSAELAILGRLSEKHLHMTITDLTQESLALHEMVASGGGQDPGEHIERMSMLLK  
KIKDFVQTQNPDMGPPMASRVLDSNGDSRPITIPDEFRCPISELEMKDPVIVSTGQTYER  
ACIEKIASGHHTCPTTQQKMSTSALTPNYVLRSLISQCETNGMEPPKRSTQPNKPTPACS  
SSERANIDALLSKLCSPTDEEQRSAAAE LRLLAKRNANNRICIAEAGAIPLLLSLLSSSD  
LRTQEHAVTALLNLSIHEDNKASIISSGAVPSIVHVLKNGSMEARENAATLFSLSVIDE  
YKVTIGGMGAIPALVVLLGEGSQRGKKDAAAALFNLCIYQGNKGRAIRAGLVPLIMGLVT  
NPTGALMDEAMAILSILSSHPEGKAAIGAAEPVPVVLVEMIGSGTPRNRENAAAVMLHLCS  
GEHHLVHLARAQECGIMVPLRELALNGTDRGKRKAVQLLERMSRFLVQQQEEQESQSQAS  
AQVPPQATPEQVPENDIPEQLDSPASQYPMVV

>Q9FLP6

MSATPEEDKKPDQGAHINLKVKQGDNVFFRIKRSTQLKMLMNAYCDRQSVDFNSIAFL  
FDGRRLRAEQTPDELEMEDGDEIDAMLHQ TGGGAKNGLKLF CF

>Q9LJZ5

MATVNGYTGNTPAATTPAATGSKQSAPPTKTVDSHSVLKRLQSELMGLMMGADPGISAFP  
EEDNIFCKGTITGSKDTVFEGTEYRLSLTFSNDYPFKSPKVKFETCCFHPNVDLYGNICL  
DILQDKSSAYDVRTILLSIQSLGEPNISSPLNNQAAQLSNQEEYRKMVEKLYKPLNA

>Q8S8I2

MERECGSKELFSKEELQEISGVHVGDDYVEVMCGCTSHRYGDAVARLKI FSDGELQITCQ  
CTPACLEDKLT PAAFEKHSERETSRRNRNNVVFIEGDKVPLSKTVLLRYYNKALKNSNVSK  
VIHRDEFVGCSTCGKERRFRLRSRGECRMHHD AIAEPNKCCDYPYDKITCEEEERGSRK  
VFRGCTRSPSCKGCTSCVCFGCKLCRFSDCNCQTCLDFTTNAKPI
