# Supplementary material for: iLoc-Plant: a multi-label classifier for predicting the subcellular localization of plant proteins with both single and multiple sites
Source: Royal Society of Chemistry journal article supplement (doi:10.1039/c1mb05232b), 2011-10-10
Supplement: c1mb05232b_5.pdf [file c1mb05232b_5.pdf]

**Online Supporting Information S2d.** A demonstration to show the power of **iLoc-Plant** in identifying the multiple locations of proteins via a head-to-head comparison between the results predicted by **iLoc-Plant** and those by **TargetP** (Emanuelsson et al. J. Mol. Biol., 2000, 300, 1005-1016) on the 17 multiple-location proteins in the [Online Supporting Information S2c](#). For facilitating comparison, the corresponding experimental subcellular locations as annotated in Swiss-Prot databank (Release 2011\_06 of 31-May-11) are also given. As shown from the results below, all the 17 proteins were perfectly predicted by **iLoc-Plant** for their multiple-location sites without any false positive and false negative. This kind of capacity of **iLoc-Plant** in dealing with multiple-location proteins is far beyond the reach of **TargetP**.

| Protein access number | <b>iLoc-Plant</b>  | <b>TargetP</b> | Experimental result annotated in Swiss-Prot database |
|-----------------------|--------------------|----------------|------------------------------------------------------|
| O64645                | Cytoplasm; Nuclear | Mitochondrion  | Cytoplasm; Nuclear                                   |
| O82794                | Cytoplasm; Nuclear | Other          | Cytoplasm; Nuclear                                   |
| P68395                | Cytoplasm; Nuclear | Other          | Cytoplasm; Nuclear                                   |
| P93002                | Cytoplasm; Nuclear | Other          | Cytoplasm; Nuclear                                   |
| Q7XTE8                | Cytoplasm; Nuclear | Other          | Cytoplasm; Nuclear                                   |
| Q6ZKC0                | Cytoplasm; Nuclear | Other          | Cytoplasm; Nuclear                                   |
| Q06967                | Cytoplasm; Nuclear | Other          | Cytoplasm; Nuclear                                   |
| Q94BT6                | Cytoplasm; Nuclear | Other          | Cytoplasm; Nuclear                                   |
| Q9CA64                | Cytoplasm; Nuclear | Chloroplast    | Cytoplasm; Nuclear                                   |
| Q9C9M7                | Cytoplasm; Nuclear | Other          | Cytoplasm; Nuclear                                   |
| Q9SUQ2                | Cytoplasm; Nuclear | Other          | Cytoplasm; Nuclear                                   |
| Q9SUE3                | Cytoplasm; Nuclear | Other          | Cytoplasm; Nuclear                                   |
| Q9M374                | Cytoplasm; Nuclear | Mitochondrion  | Cytoplasm; Nuclear                                   |
| Q0IMG9                | Cytoplasm; Nuclear | Other          | Cytoplasm; Nuclear                                   |
| Q9FLP6                | Cytoplasm; Nuclear | Other          | Cytoplasm; Nuclear                                   |
| Q9LJZ5                | Cytoplasm; Nuclear | Chloroplast    | Cytoplasm; Nuclear                                   |
| Q8S8I2                | Cytoplasm; Nuclear | Other          | Cytoplasm; Nuclear                                   |
