# Supplementary material for: iLoc-Plant: a multi-label classifier for predicting the subcellular localization of plant proteins with both single and multiple sites
Source: Royal Society of Chemistry journal article supplement (doi:10.1039/c1mb05232b), 2011-10-10
Supplement: c1mb05232b_8.pdf [file c1mb05232b_8.pdf]

**Online Supporting Information S3c.** Dataset used to demonstrate the power of **iLoc-Plant** in identifying proteins for their multiple locations. The dataset contains 14 independent multiple-location proteins randomly picked from Swiss-Prot database (Release 2011\_06 of 31-May-11); none of them occurs in the training dataset of **iLoc-Plant**.

---

>O64967

MEASRRSAVKPVIVLKPSKRFP LVEDTPGKASDALPLPLYLTNAVFFTLFFTVVYFLLSR  
WREKIRASIPLHAVTFPEIVAIFAFVASLIYLLGFFGIDFVQSLIIRPSGDVWSGEDYEE  
ENEVLLHEEDARTVPCGQALDCSVPSLPHMARNVTAQRLFDEKPV RVATEEDARKVSCGQ  
AVDCSLHSLPPRPPIVTSQKLFHEKTIVITTEEDEEIIKSVVAGTLP SYSLESKLGDCR  
AAAI RREALQRLTGRSLSGLPDGF DYESI LGQCCEMPVGYVQIPVGIAGPLLLNGREYS  
VPMATTEGCLVASTNRGCKAIHLSGGATSILLKDG MTRAPVVRVFSTAKRAAELKFYLEDP  
ENFDTLAVVFNRRSFRGLQSIKCAIAGKNLYLRF TCSTGDAMGMNMVSKGVQNVLDLFLQ  
TDFPDMDVIGISGNFCSDKKPAAVNWIEGRGKSVVCEAIIEGDVVRKVLKTSVESLVELN  
MLKNLTGSAMAGALGGFNAHASNIVTAIYIATGQDPAQNVES SHCITMMEAVNDGKDLHI  
SVTMP SIEVGTVGGGTQLASQSACL NLLGVKGASKDVAGANSRMLATIVTGAVLAGELSL  
MSALAAGQLVKSHMKYNRSSK DMSNLSS

>P00455

MTTAVTAAVSFPSTKTTSL SARSSSVISPDKISYKKVPLYRNV SATGKMGP IRAQIASD  
VEAPPAPAKVEKHSKMEEGITV NKFKPKTPYVGRCLLNTKITGDDAPGETWHMVFSHE  
GEIPYREGQSVGVI PDGEDKNGKPHKRLRYSIASSALGDFGDAKSVSL CVKRLIYTNDAG  
ETIKGVCSNFLCDLKP GAEVKLTGPVVGKEMLPKDPNATIIMLGTGTGIAPFRSFLWKMF  
FEKHDDYKFNGLAWLFLGVPTSS SLLYKEEFEKMK EKAPDNFRLDFAVSREQTNEKGEKM  
YIQTRMAQYAVELWEMLK KDNTYFYMCGLKGMEKGI DDIMVSLAAAEGIDWIEYKRQLKK  
AEQWNVEVY

>P07839

MAMAMRSTFAARVGAKPAVRGARPASRMSCMAYKVTLKTPSGDKTIECPADTYILDAAEE  
AGLDLPYSCRAGACSSCAGKVAAGTV DQSDQSFLDDAQMGNGFVLT CVAYPTSDCTIQTH  
QEEALY

>P08197

MLQLANRSVRAKAARASQSARSVSCAAAKRGADVAPLTSALAVTASILLTTGAASASAAD  
LALGAQVFNGNCAACHMGRNSVMPEKTLDKAALEQYLDGGFKVESIIYQVENGKGAMPA  
WADRLSEEEIQAVAEYVFKQATDAWKY

>P26956

MASLMRKA AVAPAKATRRTTVKASASLQ RVAQAAGVAVAGFSLALSANAANVKLGADSGAL  
VFEPATVTIKAGDSVTW TNNAGFPHNIVFDEDAVPAGVNADALSHDDYLNAPGESY TAKF  
DTAGEYGYFCEPHQGAGMVGKVI VQ

>P29057

MDTTGRLHHRKHATPVEDRSPTTPKASDALPLPLYLTNAVFFTLFFSVAYYLLHRWRDKI  
RNSTPLHIVTLSEIVAIIVSLIASFIYLLGFFGIDFVQSF IARASHDVWDLEDTPNYLID  
EDHRLVTCPPANISTKTTIIAAPTKLPTSEPLIAPLVSEEDEMIVNSVVDGKIPSYSLES

KLGDCKRAAAIRREALQRMTRRSLEGLPVEGFDYESILGQCCEMPVGYVQIPVGIAGPLL  
LNGREYSVPMATTEGCLVASTNRGCKAIYLSGGATSVLLKDG MTRAPVVRFASATRAAEL  
KFFLEDPDNFDTLAVVFNKSSRFARLQGIKCSIAGKNLYIRFSCSTGDAMGMNMVSKGVQ  
NVLEFLQSDFSMDVIGISGNFCSDDKPAAVNWIEGRGKSVVCEAI I KEEVVKVLKTNV  
ASLVELNMLKNLAGSAVAGALGGFNAHAGNIVSAIFIATGQDPAQNVESSHCHITMMEAVN  
DGKDLHISVTMPSIEVGTVGGGTQLASQSACLNLLGVKGANKESPGSNSRLLAAIVAGSV  
LAGELSLMSAIAAGQLVKSHMKYNRSSKDSKAAS

>P29058

LESDFADMDVIGISGNFCSDDKPAAVNWIEGRGKSVVCEAI I KEEVVKVLKTDVALLVE  
LNMLKNLAGSAVAGALGGFNAHAGNIVSAIFIATGQDPAQNVESSHCHITMMEAVNDGKDL  
HISVTLPSIEVGTVGGGTQLASQSACLNLLGVMGACKESPGSYSRLLATIVAGSVLAGEL  
SLMSAIAAGQLVKSHMKYNRSSKDVSKAAS

>P53991

MASLRKPSNHADRACSRRLRVATRVAGRRMCRPVAATKASTAVTTDMSKRTVPTKLEEGE  
MPLNTYSNKAPFKAKVRSVEKITGPKATGETCHII IETEGKIPFWEGQSYGVI PPGTKIN  
SKGKEVPTARLYSIASSRYGDDGDGTASLCVRRAVYVDPETGKEDPAKKGLCSNFLCDA  
TPGTEISMTGPTGKVL LLLPADANAPLICVATGTGIAPFRSFWRRCFIENVPSYKFTGLFW  
LFMGVGNSDAKLYDEELQAI AKAYPGQFRLDYALSREQNNRKGKMYIQDKVEEYADEIF  
DLLDNGAHMYFCGLKGMMPGIQDMLERVAKKGLNYEEWVEGLKHKNQWHVEVY

>P56408

YKVTLKTPSGEETIECPEDTYILDAAEEAGLDLPYSCRAGACSSCAGKVESGEVDQSDQS  
FLDDAQMGKGFVLTVCVAYPTSDVTILTHQEAAALY

>Q00583

MDEVRRRPPKHIVRKDHDGEVLNSFSHGHHLPPLKPSDYSPLSLYLANALVFSLFFSVA  
YFLLHRWREKIRKSTPLHIVTFPEIAALICLVASVIYLLGFFGIGFVHSFSRASTDSWDV  
EEYDDDNI I IKEDTRPTGACAAPSLDCSLSLPTKIHAPIVSTTTTSTLSDDDEQI I KSVV  
SGSIPSYSLESKLGNCRAALIRRETLQRMGRSLEGLPLDGFYDYESILGQCCEMAIGYV  
QIPVGIAGPLLLDQKEYTVPMATTEGCLVASANRGCKAIYASGGATSVLLRDGMTRAPVV  
RFPTAKRAADLKFFMEDPDNFDTI AVVFNKSSRFARLQSVQCAIAGKNLYMRFSCSTGDA  
MGMNMVSKAVQNVIDYLQNDFPMDVIGLTGNFCADKAAAVNWIEGRGKSVVCEAI I KE  
EVVVKVLKTNVAALVELNMIKNLTGSAVAGSLGGFNAHASNMVTAVYIATGQDPAQNVE  
SHCHITMMEAVNDGKDLHISVSMPSIELGTVGGGTQLASQSACLNLLGVKGASKDSPGNS  
RLLATIVAGSVLAGELSLMSAIAAGQLVNSHMKYNRSAKDVSKITF

>Q09099

EADLALGKAVFDGNCAACHAGGNNVIPDHTLQKAAIEQFLDGGFNIEAIVYQIENGKGA  
MPAWDGRLEDEIAGVAAYVYDQAAGNKW

>Q41142

MAQISLHGTLHVTIYEVDKLHSGGGPHFFRKLVENIEETVGFVGKGVSKLYATIDLEKARV  
GRTRILENEQSNPRWYESFHVYCAHQASNVI FTVKDDNPIGATLIGRAYVPVEELLDGEE  
IDRWVEILDEDKNPVHSGSKIHVKLQYFEVTKDRNWQGIRSSKYPGVPYTYFSQRQGCK  
VSLYQDAHIPDKFVPQIPLAGGNYEPHRCWEDVFDAITNAKHLIYITGWSVYTEISLIR  
DSRRPKPGGDITLGELLKKKASEGVRVLMVWDDRTSVGLLKKDGLMATHDEETEHEFFQN  
TDVHCVLCPRNPDDGGSFVQDLQISTMFTHHQKIVVVD SAMPNGDSQRRRIVSFVGGDL  
CDGRYDSPFHS LFR TLDSAHHDDFHQPNFAGASIEKGGPREPWHDIHSRLEGPIAWDVLF

NFEQRWRKQGGKDLLIQLELEDV I I P P S P V M Y P D D F E A W N V Q L F R S I D G G A A F G F P E T P  
E D A P E A G L V S G K D N I I D R S I Q D A Y I H A I R R A K N F I Y I E N Q Y F L G S S F G W S P D G I K P E D I N  
A L H L I P K E L S L K I L S K I A A G E R F T V Y I V V P M W P E G I P E S A S V Q A I L D W Q K R T M E M M Y K D I  
V Q A L K A N G I I E D P R N Y L T F F C L G N R E V K K S G E Y E P A E K P E P D T D Y I R A Q E A R R F M I Y V H T  
K M M I V D D E Y I I I G S A N I N Q R S M D G A R D S E I A M G A Y Q P H H L S T R Q P A R G Q I H G F R M S L W Y E  
H L G M L D E S F L N P E S E E C V R K V N Q M A E K Y W D L Y S S E T L E H D L P G H L L R Y P I G V A S E G D V T E  
L P G T E F F P D T K A R V L G A K S D Y L P P I L T T

>Q9FGM0

M S S S T L Q A S L F L R P P L H T S S F K L Y P C L F S S S S L S F C P Q S L S S F Y R L S S V L H N S R F R P L P C  
S L R Q D N V A S D S D F I P K D S A F E V T D S A E S N R L V S D T E V S E L E T N D R F V G G E E T K S G G E E A E  
V S N G V T E G K E E D Q K K S K F R I V V L M M A L W A A I K R A I E K V M E W E W L S W W P F S R Q E K R L E K L I  
A E A D A N P K D A A L Q G A L L A E L N K H I P E A V V Q R F E Q R E H T V D S R G V A E Y I R A L V I T N A I S E Y  
L P D E Q T G K P S S L P A L L Q E L K H R A S G N M D E S F V N P G I S E K Q P L H V T M V N P K V S N K S R F A Q E  
L V S T I L F T V A V G L V W I M G A A A L Q K Y I G S L G G I G T S G V G S S S S Y S P K E L N K E I T P E K N V K T  
F K D V K G C D D A K Q E L E E V V E Y L K N P S K F T R L G G K L P K G I L L T G A P G T G K T L L A K A I A G E A G  
V P F F Y R A G S E F E E M F V G V G A R R V R S L F Q A A K K A P C I I F I D E I D A V G S T R K Q W E G H T K K T  
L H Q L L V E M D G F E Q N E G I V M A A T N L P D I L D P A L T R P G R F D R H I V V P S P D V R G R E E I L E L Y  
L Q G K P M S E D V D V K A I A R G T P G F N G A D L A N L V N I A A I K A A V E G A E K L S S E Q L E F A K D R I V M  
G T E R K T M F V S E D S K K L T A Y H E S G H A I V A L N T K G A H P I H K A T I M P R G S A L G M V T Q L P S N D E  
T S V S K R Q L L A R L D V C M G G R V A E E L I F G L D H I T T G A S S D L S Q A T E L A Q Y M V S S C G M S E A I G  
P V H I K E R P S S D M Q S R I D A E V V K L L R E A Y E R V K S L L K R H E K Q L H T L A N A L L E Y E T L T A E D I  
K R I L L P K Q E G E K F E E Q Q Q E E G D L V L A

>Q9M5P4

M S L L A A A I P S T S S H F S A P F L P S F R M P R K S L T A P L H R I R R P R P F T V V S S V P D P A A G P V E Y T  
P W L I A G L G N P G N K Y Y G T R H N V G F E M V D R I A A E E G I T M N T I Q S K S L L G I G S I G E V P V L V V K  
P Q S Y M N Y S G E A I G P L A A Y Y Q V P L R H I L L I Y D D T S L P N G V L R L Q K K G G H G R H N G L Q N V I E H  
L D G R R E F P R L S I G I G S P P G K M D P R A F L L Q K F S S E E R V Q I D T A L E Q G V D A V R T L V L K G F S G  
S T E R F N L V Q K Y K F H R V
