# Supplementary material for: iLoc-Plant: a multi-label classifier for predicting the subcellular localization of plant proteins with both single and multiple sites
Source: Royal Society of Chemistry journal article supplement (doi:10.1039/c1mb05232b), 2011-10-10
Supplement: c1mb05232b_9.pdf [file c1mb05232b_9.pdf]

**Online Supporting Information S3d.** A demonstration to show the power of **iLoc-Plant** in identifying the multiple locations of proteins via a head-to-head comparison between the results predicted by **iLoc-Plant** and those by **Predotar** (Small et al. Proteomics, 2004, 4, 1581-1590) on the 14 multiple-location proteins in the [Online Supporting Information S3c](#). For facilitating comparison, the corresponding experimental subcellular locations as annotated in Swiss-Prot databank (Release 2011\_06 of 31-May-11) are also given. As shown from the results below, of the 14 proteins, 13 were perfectly predicted by **iLoc-Plant** for their multiple-location sites without any false positive and false negative, while 1 was partially correctly predicted. This kind of capacity of **iLoc-Plant** in dealing with multiple-location proteins is far beyond the reach of **Predotar**.

| Accession number | <b>iLoc-Plant</b>                             | <b>Predotar</b>         | Experimental result annotated in Swiss-Prot database |
|------------------|-----------------------------------------------|-------------------------|------------------------------------------------------|
| O64967           | Endoplasmic reticulum; Mitochondrion          | none <sup>a</sup>       | Endoplasmic reticulum; Mitochondrion; Plastid        |
| P00455           | Plastid; Chloroplast                          | plastid                 | Plastid; Chloroplast                                 |
| P07839           | Plastid; Chloroplast                          | mitochondrial           | Plastid; Chloroplast                                 |
| P08197           | Plastid; Chloroplast                          | mitochondrial           | Plastid; Chloroplast                                 |
| P26956           | Plastid; Chloroplast                          | mitochondrial           | Plastid; Chloroplast                                 |
| P29057           | Endoplasmic reticulum; Mitochondrion; Plastid | none <sup>a</sup>       | Endoplasmic reticulum; Mitochondrion; Plastid        |
| P29058           | Endoplasmic reticulum; Mitochondrion; Plastid | discarding <sup>b</sup> | Endoplasmic reticulum; Mitochondrion; Plastid        |
| P53991           | Plastid; Chloroplast                          | possibly mitochondrial  | Plastid; Chloroplast                                 |
| P56408           | Plastid; Chloroplast                          | discarding <sup>b</sup> | Plastid; Chloroplast                                 |
| Q00583           | Endoplasmic reticulum; Mitochondrion; Plastid | none <sup>a</sup>       | Endoplasmic reticulum; Mitochondrion; Plastid        |
| Q09099           | Plastid; Chloroplast                          | discarding <sup>b</sup> | Plastid; Chloroplast                                 |
| Q41142           | Endoplasmic reticulum; Plastid; Vacuole       | none <sup>a</sup>       | Endoplasmic reticulum; Plastid; Vacuole              |
| Q9FGM0           | Mitochondrion; Plastid; Chloroplast           | plastid                 | Mitochondrion; Plastid; Chloroplast                  |
| Q9M5P4           | Plastid; Chloroplast                          | plastid                 | Plastid; Chloroplast                                 |

<sup>a</sup> In the output of Predotar, “none” means “no target sequence”.

<sup>b</sup> In the output of Predotar, “discarding” means “reject to predict the query protein”.
